# Supplementary material for: A Meta-Analysis of the Impacts of Genetically Modified Crops
Source: PubMed Central journal article supplement (PMC4218791; doi:10.1371/journal.pone.0111629), 2014-11-03
Supplement: pone.0111629.s002.pdf [file pone.0111629.s002.pdf]

**Figure S2. Impacts of GM crop adoption including only studies published in journals**

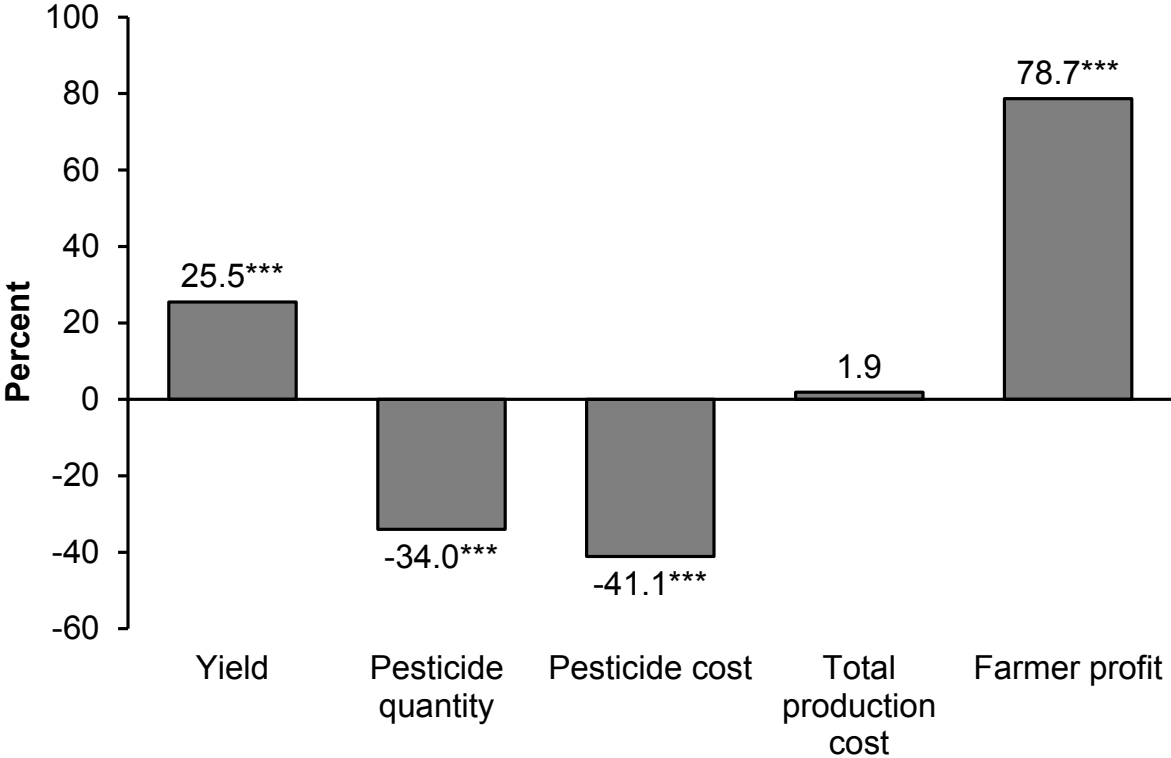

Notes: Average percentage differences between GM and non-GM crops are shown. Results refer to all GM crops, including herbicide-tolerant and insect-resistant traits. The number of observations varies by outcome variable; yield: 317; pesticide quantity: 90; pesticide cost: 126; total production cost: 84; farmer profit: 94. \*\*\* indicates statistical significance at the 1% level.
