# Supplementary material for: A Meta-Analysis of the Impacts of Genetically Modified Crops
Source: PubMed Central journal article supplement (PMC4218791; doi:10.1371/journal.pone.0111629), 2014-11-03
Supplement: pone.0111629.s004.pdf [file pone.0111629.s004.pdf]

**Table S1. List of publications included in the meta-analysis**

| Number | Publication                                                                                                                                                                                                                                                                                                             |
|--------|-------------------------------------------------------------------------------------------------------------------------------------------------------------------------------------------------------------------------------------------------------------------------------------------------------------------------|
| 1      | Abdullah, A. An analysis of Bt cotton cultivation in Punjab, Pakistan using the agriculture decision support system (ADSS). <i>AgBioForum</i> <b>13</b> , 274–287 (2010).                                                                                                                                               |
| 2      | Ali, A. & Abdulai, A. The adoption of genetically modified cotton and poverty reduction in Pakistan. <i>Journal of Agricultural Economics</i> <b>61</b> , 175–192 (2010).                                                                                                                                               |
| 3      | Andersen, M. N. Sausse, C. Lacroix, B. Caul, S. & Messean, A. Agricultural studies of GM maize and the field experimental infrastructure of ECOGEN. <i>Pedobiologia</i> <b>51</b> , 175–184 (2007).                                                                                                                     |
| 4      | Ansingkar, A. S. More, S. S. Bhatade, S. S. Dhuppe, M. V. & Choudhary, L. M. Evaluation of transgenic Bt cotton hybrids in comparison with non-Bt and checks in rainfed condition. <i>Journal of Soils and Crops</i> <b>15</b> , 338–342 (2005).                                                                        |
| 5      | Badiz Furlaneto, F. d. P. Reco, P. C. Dias Kanthack, R. A. Tsutsui Esperancinil, M. S. & Oliveira Ojima, A. L. R. de. Transgenic versus conventional soybean: estimative of the operational production costs in the Middle Paranapanema, Sao Paulo State. <i>Ciencia e Agrotecnologia</i> <b>32</b> , 1935–1940 (2008). |
| 6      | Banerjee, S. B. & Martin, S. W. An estimation of producer returns from Bt cotton with varying refuge sizes. <i>Crop Protection</i> <b>27</b> , 1003–1008 (2008).                                                                                                                                                        |
| 7      | Barry, B. D. <i>et al.</i> Performance of transgenic corn hybrids in Missouri for insect control and yield. <i>Journal of Economic Entomology</i> <b>93</b> , 993–999 (2000).                                                                                                                                           |
| 8      | Barwale, R. B. Gadwal, V. R. Zehr, U. & Zehr, B. Prospects for Bt cotton technology in India. <i>AgBioForum</i> <b>7</b> , 23–26 (2004).                                                                                                                                                                                |
| 9      | Benbrook, C. <i>Evidence of the Magnitude and Consequences of the Roundup Ready Soybean Yield Drag from University-Based Varietal Trials in 1998</i> . (Ag Biotech InfoNet, Idaho, 1999).                                                                                                                               |
| 10     | Bennett, R. Buthelezi, T. J. Ismael, Y. & Morse, S. Bt cotton, pesticides, labour and health - A case study of smallholder farmers in the Makhathini Flats, Republic of South Africa. <i>Outlook on Agriculture</i> <b>32</b> , 123–128 (2003).                                                                         |
| 11     | Bennett, R. M. Ismael, Y. Kambhampati, U. & Morse, S. Economic impact of genetically modified cotton in India. <i>AgBioForum</i> <b>7</b> , 96–100 (2004).                                                                                                                                                              |
| 12     | Bennett, R. Ismael, Y. & Morse, S. Explaining contradictory evidence regarding impacts of genetically modified crops in developing countries: varietal performance of transgenic cotton in India. <i>Journal of Agricultural Science</i> <b>143</b> , 35–42 (2005).                                                     |
| 13     | Bennett, R. Ismael, Y. Morse, S. & Shankar, B. Reductions in insecticide use from adoption of Bt cotton in South Africa: impacts on economic performance and toxic load to the environment. <i>Journal of Agricultural Science</i> <b>142</b> , 665–674 (2004).                                                         |
| 14     | Bennett, R. Kambhampati, U. Morse, S. & Ismael, Y. Farm-level economic performance of genetically modified cotton in Maharashtra, India. <i>Review of Agricultural Economics</i> <b>28</b> , 59–71 (2006).                                                                                                              |
| 15     | Bennett, R. Morse, S. & Ismael, Y. The economic impact of genetically modified cotton on South African smallholders: yield, profit and health effects. <i>Journal of Development Studies</i> <b>42</b> , 662–677 (2006).                                                                                                |
| 16     | Beyers, L. Ismael, Y. & Piesse, J. Can GM-technologies help the poor? The impact of Bt cotton in Makhathini Flats, Kwazulu-Natal. <i>World Development</i> <b>31</b> , 717–732 (2003).                                                                                                                                  |
| 17     | Beyers, L. & Thirtle, C. G. <i>Can GM-Technologies Help African Smallholders? The Impact of Bt Cotton in the Makhathini Flats of Kwazulu-Natal</i> . International Association of Agricultural Economists 2003 Annual Meeting (Durban, South Africa, 2003).                                                             |
| 18     | Bheemanna, M. Patil, B. V. Hanchinal, S. G. Hosamani, A. C. & Bansi, A. B. Comparative performance and economics of Bollgard-II Bt cotton under irrigated conditions. <i>Journal of Cotton Research and Development</i> <b>22</b> , 118–121 (2008).                                                                     |
| 19     | Brethour, C. Mussell, A. Mayer, H. & Martin Larry. <i>Agronomic, Economic and Environmental Impacts of the Commercial Cultivation of Glyphosate Tolerant Soybeans in Ontario</i> (George Morris Centre, Guelph, 2002).                                                                                                  |
| 20     | Brookes, G. The farm-level impact of herbicide-tolerant soybeans in Romania. <i>AgBioForum</i> <b>8</b> , 235–241 (2005).                                                                                                                                                                                               |
| 21     | Cattaneo, M. G. <i>et al.</i> Farm-scale evaluation of the impacts of transgenic cotton on biodiversity, pesticide use, and yield. <i>Proceedings of the National Academy of Sciences</i> <b>103</b> , 7571–7576 (2006).                                                                                                |
| 22     | Ceddia, M. G. Gomez-Barbero, M. & Rodriguez-Cerezo, E. An ex-ante evaluation of the economic impact of Bt cotton adoption by Spanish farmers facing the EU cotton sector reform. <i>AgBioForum</i> <b>11</b> , 82–92 (2008).                                                                                            |
| 23     | Crost, B. Shankar, B. Bennett, R. & Morse, S. Bias from farmer self-selection in genetically modified crop productivity estimates: evidence from Indian data. <i>Journal of Agricultural Economics</i> <b>58</b> , 24–36 (2007).                                                                                        |
| 24     | Dev, S. M. & Rao, N. C. <i>Socioeconomic Impact of Bt Cotton</i> (Centre for Economic and Social Studies, Hyderabad, 2007).                                                                                                                                                                                             |

|    |                                                                                                                                                                                                                                                                       |
|----|-----------------------------------------------------------------------------------------------------------------------------------------------------------------------------------------------------------------------------------------------------------------------|
| 25 | Dhillon, M. K. Pampapathy, G. Wadaskar, R. M. & Sharma, H. C. Impact of Bt transgenic cottons and insecticides on target and non-target insect pests, natural enemies and seedcotton yield in India. <i>Indian Journal of Agricultural Sciences</i> <b>82</b> (2012). |
| 26 | Diaz-Osorio, J. Herrera R. Valderrama J. & Llanos-Ascencio J. L. Potential changes in the competitiveness of maize growers in Central Chile through the use of transgenic seed (Bt and RR). <i>Spanish Journal of Agricultural Research</i> <b>2</b> (2004).          |
| 27 | Dong, H. Li, W. Tang, W. & Zhang, D. Development of hybrid Bt cotton in China - A successful integration of transgenic technology and conventional techniques. <i>Current Science</i> <b>86</b> , 778–782 (2004).                                                     |
| 28 | Doyle, B. Reeve I. & Barclay, E. The Performance of Ingard Cotton in Australia during the 2000/2001 Season. Institute for Rural Futures, University of New England, Armidale, New South Wales, Australia (2002).                                                      |
| 29 | Doyle, B. Reeve I. & Bock K. The Performance of Ingard Cotton in Australia during the 2001/2002 Season. Institute for Rural Futures, University of New England, Armidale, New South Wales, Australia (2002).                                                          |
| 30 | Duffy, M. & E. M. Does planting GMO seed boost farmers' profits? <i>Leopold Letter</i> , 1999.                                                                                                                                                                        |
| 31 | Duffy, M. <i>Who Benefits from Biotechnology?</i> Presented at the American Seed Trade Association Meeting (Chicago, IL, 2001).                                                                                                                                       |
| 32 | Falck-Zepeda, J. T. G. a. N. R. Rent creation and distribution from biotechnology innovations: the case of Bt cotton and herbicide-tolerant soybeans in 1997. <i>Agribusiness</i> <b>16</b> , 21–32 (2000).                                                           |
| 33 | Fernandez-Cornejo, J. & Li, J. <i>The Impacts of Adopting Genetically Engineered Crops in the USA: The Case of Bt Corn</i> . Presented at the American Agricultural Economics Association Annual Meeting (Providence, Rhode Island, 2005).                            |
| 34 | Fernandez-Cornejo, J. & Wechsler, S. <i>Revisiting the Impact of Bt Corn Adoption by U.S. Farmers</i> . Agricultural and Applied Economics Association's AAEA and NAREA Joint Annual Meeting (Pittsburgh, PA, 2011).                                                  |
| 35 | Fernandez-Cornejo, J. & Wechsler, S. J. Revisiting the impact of Bt corn adoption by U.S. farmers. <i>Agricultural and Resource Economics Review</i> <b>41</b> , 377–390 (2012).                                                                                      |
| 36 | Fernandez-Cornejo, J. & Wechsler, S. <i>Fifteen Years Later: Examining the Adoption of Bt Corn Varieties by US Farmers</i> . Presented at the Agricultural and Applied Economics Association's AAEA Annual Meeting (Seattle, VA, 2012).                               |
| 37 | Fok, M. A. C. Gouse M. Hofs J.-L. & Kirsten J. Contextual appraisal of GM cotton diffusion in South Africa. <i>Life Sciences International Journal</i> <b>1</b> , 468–482 (2007).                                                                                     |
| 38 | Gandhi, V. P. & Namboodiri, N. V. <i>The Adoption and Economics of Bt Cotton in India: Preliminary Results from a Study</i> . Indian Institute of Management, Ahmedabad, 2006.                                                                                        |
| 39 | Gaurav, S. & Mishra, S. <i>To Bt or not to Bt? Risk and Uncertainty Considerations in Technology Assessment</i> . Indira Gandhi Institute of Development Research, Mumbai, 2012.                                                                                      |
| 40 | Gómez-Barbero, M., Berbel, J. & Rodríguez-Cerezo, E. Adoption and performance of the first GM crop introduced in EU agriculture: Bt maize in Spain. Joint Research Center, Seville, 2008.                                                                             |
| 41 | Gouse, M. GM Maize as subsistence crop: the South African smallholder experience. <i>AgBioForum</i> <b>15</b> , 163–174 (2012).                                                                                                                                       |
| 42 | Gouse, M. Gouse, M. Piesse, J. & Thirtle, C. G. Output and labour effects of GM maize and minimum tillage in a communal area of Kwa-Zulu-Natal. <i>Journal of Development Perspectives</i> <b>2</b> , 71–86 (2006).                                                   |
| 43 | Gouse, M. Kirsten, J. F. & Jenkins, L. Bt cotton in South Africa: Adoption and the impact on farm incomes amongst small-scale and large scale farmers. <i>Agrekon</i> <b>42</b> , 15–29 (2003).                                                                       |
| 44 | Gouse, M. Piesse, J. Thirtle, C. & Poulton, C. Assessing the performance of GM maize amongst smallholders in KwaZulu-Natal, South Africa. <i>AgBioForum</i> <b>12</b> , 78–89 (2009).                                                                                 |
| 45 | Gouse, M. Pray, C. E. Kirsten, J. & Schimmelpfennig, D. A GM subsistence crop in Africa: the case of Bt white maize in South Africa. <i>International Journal of Biotechnology</i> <b>7</b> , 84–94 (2005).                                                           |
| 46 | Gouse, M. Pray, C. Schimmelpfennig, D. & Kirsten, J. Three seasons of subsistence insect-resistant maize in South Africa: have smallholders benefited? <i>AgBioForum</i> <b>9</b> , 15–22 (2006).                                                                     |
| 47 | Government of Andhra Pradesh. Performance Report of Bt Cotton in Andhra Pradesh. Report of State Department of Agriculture, Hyderabad, 2003.                                                                                                                          |
| 48 | Gruere, G. P. & Sun, Y. Measuring the Contribution of Bt Cotton Adoption to India's Cotton Yields Leap. IFPRI Discussion Paper 01170, International Food Policy Research Institute, Washington, DC, 2012.                                                             |
| 49 | Gulden, R. H. Sikkema, P. H. Hamill, A. S. Tardif, F. & Swanton, C. J. Conventional vs. glyphosate-resistant cropping systems in Ontario: weed control, diversity, and yield. <i>Weed Science</i> <b>57</b> , 665–672 (2009).                                         |
| 50 | Hategekimana, B. Genetically Modified Grain Corn and Soybean in Quebec and Ontario in 2000 and 2001. Agriculture and Rural Working Paper Series 54. Statistics Canada, 2002.                                                                                          |

|    |                                                                                                                                                                                                                                                                                                     |
|----|-----------------------------------------------------------------------------------------------------------------------------------------------------------------------------------------------------------------------------------------------------------------------------------------------------|
| 51 | Heatherly, L. G. Elmore, C. D. & Spurlock, S. R. Weed management systems for conventional and glyphosate-resistant soybean with and without irrigation. <i>Agronomy Journal</i> <b>94</b> , 1419–1428 (2002).                                                                                       |
| 52 | Hofs, J. L. Hau, B. Marais, D. & Fok, M. Boll distribution patterns in Bt and non-Bt cotton cultivars: II. Study on small-scale farming systems in South Africa. <i>Field Crops Research</i> <b>98</b> , 210–215 (2006).                                                                            |
| 53 | Hofs, J.-L. Fok, M. & Vaissayre, M. Impact of Bt cotton adoption on pesticide use by smallholders: A 2-year survey in Makhathini Flats (South Africa). <i>Crop Protection</i> <b>25</b> , 984–988 (2006).                                                                                           |
| 54 | Hu, R. <i>et al.</i> Reforming intellectual property rights and the Bt cotton seed industry in China: who benefits from policy reform? <i>Research Policy</i> <b>38</b> , 793–801 (2009).                                                                                                           |
| 55 | Huang, J. K. Rozelle, S. Pray, C. & Wang, Q. F. Plant biotechnology in China. <i>Science</i> <b>295</b> , 674–677 (2002).                                                                                                                                                                           |
| 56 | Huang, J. Hu, R. & Fan, C. Bt cotton benefits, costs, and impacts in China. <i>AgBioForum</i> <b>5</b> , 153–166 (2002).                                                                                                                                                                            |
| 57 | Huang, J. Hu, R. Pray, C. Qiao, F. & Rozelle, S. Biotechnology as an alternative to chemical pesticides: a case study of Bt cotton in China. <i>Agricultural Economics</i> <b>29</b> , 55–67 (2003).                                                                                                |
| 58 | Huang, J. Hu, R. Rozelle, S. Qiao, F. & Pray, C. Small holders, transgenic varieties, and production efficiency: the case of cotton farmers in China. Dept. of Agricultural & Resource Economics Working Paper 01-015, University of California, Davis 2001.                                        |
| 59 | Huang, J. Hu, R. Rozelle, S. Qiao, F. & Pray, C. E. Transgenic varieties and productivity of smallholder cotton farmers in China. <i>Australian Journal of Agricultural and Resource Economics</i> <b>46</b> , 367–387 (2002).                                                                      |
| 60 | IMRB International. Socio Economic Benefits of Bollgard and Product Satisfaction (in India). Indian Market Research Bureau (IMRB) International, Mumbai (2005).                                                                                                                                     |
| 61 | Ismael, Y. Bennett, R. & Morse, S. Benefits from Bt cotton use by smallholder farmers in South Africa. <i>AgBioForum</i> <b>5</b> , 1–5 (2002).                                                                                                                                                     |
| 62 | Ismael, Y. Bennett, R. & Morse, S. <i>Biotechnology in Africa: The Adoption and Economic Impacts of Bt Cotton in the Makhathini Flats, Republic of South Africa</i> . Paper presented for AfricaBio Conference: Biotechnology Conference for Sub-Saharan Africa (Johannesburg, South Africa, 2001). |
| 63 | Janaki, P. & Raja, D. Performance, benefits and impact of Bt cotton production in Salem, India. <i>Agriculture Update</i> <b>4</b> , 171–173 (2009).                                                                                                                                                |
| 64 | Kapadiya, H. J. Butani, A. M. Khanpara, M. D. & Nariya, J. N. Farmers' participation in front line demonstration (FLD) for Bt cotton in Saurashtra region of Gujarat. <i>Journal of Cotton Research and Development</i> <b>26</b> , 137–141 (2012).                                                 |
| 65 | Kathage, J. & Qaim, M. Economic impacts and impact dynamics of Bt ( <i>Bacillus thuringiensis</i> ) cotton in India. <i>Proceedings of the National Academy of Sciences</i> <b>109</b> , 11652–11656 (2012).                                                                                        |
| 66 | Keetch, D. P. Ngqaka, A. Akanbi, R. & Mahlanga, P. Bt maize for small scale farmers: a case study. <i>African Journal of Food, Agriculture, Nutrition and Development</i> <b>4</b> , 1505–1509 (2005).                                                                                              |
| 67 | Kiresur, V. R. & Ichangi, M. Socio-economic impact of Bt cotton—a case study of Karnataka. <i>Agricultural Economics Research Review</i> <b>24</b> (2011).                                                                                                                                          |
| 68 | Klotz-Ingram, C. a. Farm-level production effects related to the adoption of genetically modified cotton for pest management. <i>AgBioForum</i> <b>2</b> , 73–84 (1999).                                                                                                                            |
| 69 | Kouser, S. & Qaim, M. Impact of Bt cotton on pesticide poisoning in smallholder agriculture: a panel data analysis. <i>Ecological Economics</i> <b>70</b> , 2105–2113 (2011).                                                                                                                       |
| 70 | Kouser, S. & Qaim, M. <i>Valuing financial, health, and environmental benefits of Bt cotton in Pakistan</i> . Presented at the International Association of Agricultural Economists (IAAE) Triennial Conference (Foz do Iguacu, Brazil, 18–24 August, 2012).                                        |
| 71 | Krishna, V. V. & Qaim, M. Bt cotton and sustainability of pesticide reductions in India. <i>Agricultural Systems</i> <b>107</b> , 47–55 (2012).                                                                                                                                                     |
| 72 | Lalitha, N. R. B. & V. P. in <i>Biotechnology and agricultural development: Transgenic cotton, rural institutions and resource-poor farmers</i> , edited by R. Tripp (Routledge, Abingdon, Oxon, 2009), pp. 135–167.                                                                                |
| 73 | Lin, W. Price, G. K. & Fernandez-Cornejo, J. Estimating farm-level effects of adopting herbicide-tolerant soybeans. <i>Oil Crops Situation and Outlook</i> October 2001, 25–34 (United States Department of Agriculture, Washington, DC, 2001).                                                     |
| 74 | Loganathan, R. Balasubramanian, R. Mani, K. & Gurunathan, S. Productivity and profitability impact of genetically modified crops – an economic analysis of Bt cotton cultivation in Tamil Nadu. <i>Agricultural Economics Research Review</i> <b>22</b> , 331–340 (2009).                           |
| 75 | Ma, B. L. Meloche, F. & Wei, L. Agronomic assessment of Bt trait and seed or soil-applied insecticides on the control of corn rootworm and yield. <i>Field Crops Research</i> <b>111</b> , 189–196 (2009).                                                                                          |
| 76 | Ma, B. L. & Subedi, K. D. Development, yield, grain moisture and nitrogen uptake of Bt corn hybrids and their                                                                                                                                                                                       |

|     |                                                                                                                                                                                                                                                                                     |
|-----|-------------------------------------------------------------------------------------------------------------------------------------------------------------------------------------------------------------------------------------------------------------------------------------|
|     | conventional near-isolines. <i>Field Crops Research</i> <b>93</b> , 199–211 (2005).                                                                                                                                                                                                 |
| 77  | Mal, P. Manjunatha, A. V. Bauer, S. & Ahmed, M. N. Technical efficiency and environmental impact of Bt cotton and non-Bt cotton in North India. <i>AgBioForum</i> <b>14</b> , 164–170 (2011).                                                                                       |
| 78  | McBride, W. D. & Brooks, N. Survey evidence on producer use and costs of genetically modified seed. <i>Agribusiness</i> <b>16</b> , 6–20 (2000).                                                                                                                                    |
| 79  | McBride, W. D. & El-Osta, H. S. Impacts of the adoption of genetically engineered crops on farm financial performance. <i>Journal of Agricultural and Applied Economics</i> <b>34</b> , 175–191 (2002).                                                                             |
| 80  | Ministry of Agriculture of the Czech Republic. Experience with Bt maize cultivation in the Czech Republic 2005–2009 (Ministry of Agriculture of the Czech Republic, Prague, 2010).                                                                                                  |
| 81  | Morse, S. Bennett, R. & Ismael, Y. Why Bt cotton pays for small-scale producers in South Africa. <i>Nature Biotechnology</i> <b>22</b> , 379–380 (2004).                                                                                                                            |
| 82  | Morse, S. Bennett, R. M. & Ismael, Y. Genetically modified insect resistance in cotton: some farm level economic impacts in India. <i>Crop Protection</i> <b>24</b> , 433–440 (2005).                                                                                               |
| 83  | Morse, S. Bennett, R. & Ismael, Y. Environmental impact of genetically modified cotton in South Africa. <i>Agriculture, Ecosystems &amp; Environment</i> <b>117</b> , 277–289 (2006).                                                                                               |
| 84  | Morse, S. Bennett, R. & Ismael, Y. Inequality and GM crops: a case-study of Bt cotton in India. <i>AgBioForum</i> <b>10</b> , 44–50 (2007).                                                                                                                                         |
| 85  | Morse, S. Bennett, R. & Ismael, Y. Isolating the 'farmer' effect as a component of the advantage of growing genetically modified varieties in developing countries: a Bt cotton case study from Jalgaon, India. <i>Journal of Agricultural Science</i> <b>145</b> , 491–500 (2007). |
| 86  | Muhammad, S. A. A comparative farm level cultivation of conventional and Bt cotton. <i>Scientific Papers. Series A. Agronomy</i> <b>55</b> , 207–211 (2012).                                                                                                                        |
| 87  | Mungai, N. W. Motavalli, P. P. Nelson, K. A. & Kremer, R. J. Differences in yields, residue composition and N mineralization dynamics of Bt and non-Bt maize. <i>Nutrient Cycling in Agroecosystems</i> <b>73</b> , 101–109 (2005).                                                 |
| 88  | Mutuc, M. E. M. Rejesus, R. M. Pan, S. & Yorobe Jr, J. M. Impact assessment of Bt corn adoption in the Philippines. <i>Journal of Agricultural and Applied Economics</i> <b>44</b> , 117–135 (2012).                                                                                |
| 89  | Mutuc, M. E. Rejesus, R. M. & Yorobe, J. M. JR. Yields, insecticide productivity, and Bt corn: evidence from damage abatement models in the Philippines. <i>AgBioForum</i> <b>14</b> , 35–46 (2011).                                                                                |
| 90  | Mutuc, M. Rejesus, R. M. & Yorobe, J. M. Which farmers benefit the most from Bt corn adoption? Estimating heterogeneity effects in the Philippines. <i>Agricultural Economics</i> <b>44</b> (2013).                                                                                 |
| 91  | Naik, G. Qaim M. & Zilberman D. Bt cotton controversy – some paradoxes explained. <i>Economic and Political Weekly</i> <b>40</b> , 1514–1517 (2005).                                                                                                                                |
| 92  | Narayanamoorthy, A. & Kalamkar, S. S. Is Bt cotton cultivation economically viable for Indian farmers? An empirical analysis. <i>Economic and Political Weekly</i> <b>41</b> , 2716–2724 (2006).                                                                                    |
| 93  | Nazli, H. Sarker, R. Meilke, K. D. & Orden, D. <i>Economic Performance of Bt Cotton Varieties in Pakistan</i> . Presented at the Agricultural and Applied Economics Association 2010 Annual Meeting (Denver, Colorado, 2010).                                                       |
| 94  | Nolte, S. A. & Young, B. G. Efficacy and economic return on investment for conventional and herbicide-resistant soybean ( <i>Glycine max</i> ). <i>Weed Technology</i> <b>16</b> , 388–395 (2002).                                                                                  |
| 95  | Orphal, J. Comparative Analysis of the Economics of Bt and non-Bt Cotton Production. Institute of Economics in Horticulture, Universität Hannover, Germany (2013).                                                                                                                  |
| 96  | Owen, M. D. K. <i>et al.</i> Comparisons of genetically modified and non-genetically modified soybean cultivars and weed management systems. <i>Crop Science</i> <b>50</b> , 2597–2604 (2010).                                                                                      |
| 97  | Pemsl, D. Waibel, H. & Orphal, J. A methodology to assess the profitability of Bt-cotton: case study results from the state of Karnataka, India. <i>Crop Protection</i> <b>23</b> , 1249–1257 (2004).                                                                               |
| 98  | Penna, J. A. & Lema, D. in <i>The Economic and Environmental Impacts of Agbiotech: A Global Perspective</i> , edited by N. Kalaitzandonakes (Kluwer Academic/Plenum, New York, Dordrecht and London, 2003), pp. 203–221.                                                            |
| 99  | Peshin, R. Dhawan, A. K. Vatta, K. & Singh, K. Attributes and socio-economic dynamics of adopting Bt cotton. <i>Economic and Political Weekly</i> , 73–80 (2007).                                                                                                                   |
| 100 | Pray, C. Ma, D. Huang, J. & Qiao, F. Impact of Bt cotton in China. <i>World Development</i> <b>29</b> , 813–825 (2001).                                                                                                                                                             |
| 101 | Price, G. Lin, W. Falck-Zepeda, J. & Fernandez-Cornejo, J. Size and Distribution of Market Benefits From Adopting Biotech Crops. USDA Technical Bulletin 1906, United States Department of Agriculture, Washington, DC, 2003.                                                       |
| 102 | Qaim, M. Bt cotton in India: Field trial results and economic projections. <i>World Development</i> <b>31</b> , 2115–2127 (2003).                                                                                                                                                   |

|     |                                                                                                                                                                                                                                                 |
|-----|-------------------------------------------------------------------------------------------------------------------------------------------------------------------------------------------------------------------------------------------------|
| 103 | Qaim, M. Cap, E. J. & Janvry, A. de. Agronomics and sustainability of transgenic cotton in Argentina. <i>AgBioForum</i> <b>6</b> , 41–47 (2003).                                                                                                |
| 104 | Qaim, M. & de Janvry, A. Genetically modified crops, corporate pricing strategies, and farmers' adoption: the case of Bt cotton in Argentina. <i>American Journal of Agricultural Economics</i> <b>85</b> , 814–828 (2003).                     |
| 105 | Qaim, M. & de Janvry, A. Bt cotton and pesticide use in Argentina: economic and environmental effects. <i>Environment and Development Economics</i> <b>10</b> , 179–200 (2005).                                                                 |
| 106 | Qaim, M. & Matuschke, I. Impacts of genetically modified crops in developing countries: a survey. <i>Quarterly Journal of International Agriculture</i> <b>44</b> , 207–227 (2005).                                                             |
| 107 | Qaim, M. Subramanian, A. Naik, G. & Zilberman, D. Adoption of Bt cotton and impact variability: insights from India. <i>Review of Agricultural Economics</i> <b>28</b> , 48–58 (2006).                                                          |
| 108 | Qaim, M. & Traxler, G. Roundup Ready soybeans in Argentina: farm level and aggregate welfare effects. <i>Agricultural Economics</i> <b>32</b> , 73–86 (2005).                                                                                   |
| 109 | Qayum, A. & Sakkhari, K. Bt Cotton in Andhra Pradesh – 3 Year Assessment. The First Sustained Independent Scientific Study of Bt Cotton in India. Deccan Development Society, Hyderabad, 2005.                                                  |
| 110 | Qayum, A. & Sakkhari, K. Did Bt Cotton Save Farmers in Warangal? A Season Long Impact Study of Bt Cotton - Kharif 2002. Deccan Development Society, Hyderabad, 2003.                                                                            |
| 111 | Ramasundaram, P. Vennila, S. & Ingle, R. Bt cotton performance and constraints in central India. <i>Outlook on Agriculture</i> <b>36</b> , 175–180 (2007).                                                                                      |
| 112 | Rao, N. C. & Dev, S. M. Socio-economic impact of transgenic cotton. <i>Agricultural Economics Research Review</i> <b>22</b> , 461–470 (2009).                                                                                                   |
| 113 | Reddy, K. N. & Whiting, K. Weed control and economic comparisons of glyphosate-resistant, sulfonylurea-tolerant, and conventional soybean ( <i>Glycine max</i> ) systems. <i>Weed Technology</i> <b>14</b> , 204–211 (2000).                    |
| 114 | Sadashivappa, P. & Qaim, M. Bt cotton in India: development of benefits and the role of government seed price interventions. <i>AgBioForum</i> <b>12</b> , 172–183 (2009).                                                                      |
| 115 | Sahai, S. & Rahman S. Performance of Bt cotton: data from first commercial crop. <i>Economic and Political Weekly</i> <b>38</b> , 3139–3141 (2003).                                                                                             |
| 116 | Sahai, S. & Rahman, S. Bt-Cotton performance 2003-2004: fields swamped with illegal variants. <i>Economic and Political Weekly</i> <b>39</b> , 2673–2674 (2004).                                                                                |
| 117 | Sanglestsawai, S. Rejesus, R. M. & Yorobe Jr, J. M. <i>Production Risk, Farmer Welfare, and Bt Corn in the Philippines</i> . Selected Paper prepared for presentation at the AAEA Annual Meeting (Seattle, WA, 2012).                           |
| 118 | Sankula, S. Quantification of the impacts on US agriculture of biotechnology-derived crops planted in 2005. National Center for Food and Agricultural Policy, 2006.                                                                             |
| 119 | Sankula, S. Marmon, G. & Blumenthal, E. Biotechnology-derived crops planted in 2004: impacts on US agriculture. National Center for Food and Agricultural Policy, Washington, DC, 2005.                                                         |
| 120 | Sarang, D. H. Bhatade, S. S. & Deosarkar, D. B. Evaluation of some new Bt cotton hybrids for seed cotton yield and fiber quality traits under rainfed conditions. <i>Journal of Cotton Research and Development</i> <b>24</b> , 149–154 (2010). |
| 121 | Sexton, S. E. & Zilberman, D. How Agricultural Biotechnology Boosts Food Supply and Accommodates Biofuels. NBER Working Paper Series 16699, National Bureau of Economic Research, 2011.                                                         |
| 122 | Shankar, B. Bennett, R. & Morse, S. Production risk, pesticide use and GM crop technology in South Africa. <i>Applied Economics</i> <b>40</b> , 2489–2500 (2008).                                                                               |
| 123 | Sharma, H. C. & Pampathy, G. Influence of transgenic cotton on the relative abundance and damage by target and non-target insect pests under different protection regimes in India. <i>Crop Protection</i> <b>25</b> , 800–813 (2006).          |
| 124 | Shi, G. Chavas, J.-P. & Lauer, J. Commercialized transgenic traits, maize productivity and yield risk. <i>Nature Biotechnology</i> <b>31</b> , 111–114 (2013).                                                                                  |
| 125 | Shi, G. Chavas, J.-P. Lauer, J. & Nolan, E. An analysis of selectivity in the productivity evaluation of biotechnology: an application to corn. <i>American Journal of Agricultural Economics</i> <b>95</b> , 1–16 (2013).                      |
| 126 | Shiva, V. Toxic genes and toxic papers: IFPRI covering up the link between Bt Cotton and farmers suicides. Research Foundation for Science, Technology and Ecology, New Delhi, 2008.                                                            |
| 127 | Singh, D. Pandey, R. & Kumar, V. Performance of Bt and non Bt cotton hybrids at wider spacing in north western plain zones. <i>Journal of Cotton Research and Development</i> <b>25</b> , 217–220 (2011).                                       |
| 128 | Skevas, T. Fevereiro, P. & Wesseler, J. Coexistence regulations and agriculture production: a case study of five Bt maize producers in Portugal. <i>Ecological Economics</i> <b>69</b> , 2402–2408 (2010).                                      |
| 129 | Speese, J. <i>et al.</i> Efficacy and economics of fresh-market Bt transgenic sweet corn in Virginia. <i>Crop Protection</i> <b>24</b> , 57–64 (2005).                                                                                          |

|     |                                                                                                                                                                                                                                                                                                                                 |
|-----|---------------------------------------------------------------------------------------------------------------------------------------------------------------------------------------------------------------------------------------------------------------------------------------------------------------------------------|
| 130 | Stone, G. D. Field versus Farm in Warangal: Bt cotton, higher yields, and larger questions. <i>World Development</i> <b>39</b> , 387–398 (2011).                                                                                                                                                                                |
| 131 | Subramanian, A. & Qaim, M. Village-wide effects of agricultural biotechnology: the case of Bt cotton in India. <i>World Development</i> <b>37</b> , 256–267 (2009).                                                                                                                                                             |
| 132 | Subramanian, A. & Qaim, M. <i>Rural poverty and employment effects of Bt cotton in India</i> . Presented at International Association of Agricultural Economists (IAAE) Conference (Beijing, China, 2009).                                                                                                                      |
| 133 | Sydorovych, O. & Marra, M. C. A genetically engineered crop's impact on pesticide use: a revealed-preference index approach. <i>Journal of Agricultural and Resource Economics</i> <b>32</b> , 476–491 (2007).                                                                                                                  |
| 134 | Thirtle, C. Beyers, L. Ismael, Y. & Piesse, J. Can GM-technologies help the poor? The impact of Bt cotton in Makhathini Flats, KwaZulu-Natal. <i>World Development</i> <b>31</b> , 717–732 (2003).                                                                                                                              |
| 135 | Uys, T. J. E. The Adoption of Plant Biotechnology by Commercial Cotton Producers in South Africa. Master's Thesis. University of Wales, Cardiff, 2004.                                                                                                                                                                          |
| 136 | Vado, L. & Goodwin, B. K. <i>Analyzing the Effects of Weather and Biotechnology Adoption on Corn Yields and Crop Insurance Performance in the US Corn Belt</i> . Selected Paper prepared for presentation at the Agricultural & Applied Economics Association's 2010 AAEA, CAES & WAEA Joint Annual Meeting (Denver, CO, 2010). |
| 137 | Visawadia, H. Fadadu, A. & Tarpara, V. A comparative analysis of production and marketing of Bt cotton and hybrid cotton in Saurashtra Region of Gujarat State. <i>Agricultural Economics Research Review</i> <b>19</b> , 293–300 (2006).                                                                                       |
| 138 | Vitale, J. Boyer, T. Uaiene, R. & Sanders, J. H. The economic impacts of introducing Bt technology in smallholder cotton production systems of West Africa: a case study from Mali. <i>AgBioForum</i> <b>10</b> , 71–84 (2007).                                                                                                 |
| 139 | Vitale, J. Glick, H. Greenplate, J. Abdeennadher, M. & Traore, O. Second-generation Bt cotton field trials in Burkina Faso: Analyzing the potential benefits to West African farmers. <i>Crop Science</i> <b>48</b> , 1958–1966 (2008).                                                                                         |
| 140 | Vitale, J. D. Vognan, G. Ouattarra, M. & Traore, O. The commercial application of GMO crops in Africa: Burkina Faso's decade of experience with Bt cotton. <i>AgBioForum</i> <b>13</b> , 320–332 (2010).                                                                                                                        |
| 141 | Vries, B. D. de & Fehr, W. R. Impact of the MON89788 event for glyphosate tolerance on agronomic and seed traits of soybean. <i>Crop Science</i> <b>51</b> , 1023–1027 (2011).                                                                                                                                                  |
| 142 | Wang, S. Just, D. & Pinstrup-Andersen, P. Bt-cotton and secondary pests. <i>International Journal of Biotechnology</i> <b>10</b> , 113–121 (2008).                                                                                                                                                                              |
| 143 | Wang, S. Just, D. R. & Pinstrup-Andersen, P. <i>Tarnishing silver bullets: Bt technology adoption, bounded rationality and the outbreak of secondary pest infestations in China</i> . Selected Paper prepared for presentation at the American Agricultural Economics Association Annual Meeting (Long Beach, CA, 2006).        |
| 144 | Wossink, A. & Denaux, Z. Environmental and cost efficiency of pesticide use in transgenic and conventional cotton production. <i>Agricultural Systems</i> <b>90</b> , 312–328 (2006).                                                                                                                                           |
| 145 | Xu, J. You Z. Wang W. & Yang Y. Economic analysis of Bt cotton planting in Jiangsu. <i>Journal of Yangzhou University (Agricultural and Life Science Edition)</i> <b>25</b> , 65–69 (2004).                                                                                                                                     |
| 146 | Yorobe, J. JR. & Quicoy, C. Economic impact of Bt corn in the Philippines. <i>The Philippine Agricultural Scientist</i> <b>89</b> , 258–267 (2006).                                                                                                                                                                             |
| 147 | Zambrano, P. Fonseca L.A. Cardona I. & Magalhaes E. in <i>Biotechnology and agricultural development: Transgenic cotton, rural institutions and resource-poor farmers</i> , edited by R. Tripp (Routledge, Abingdon, Oxon, 2009), pp. 168–199.                                                                                  |
