# Supplementary material for: A Meta-Analysis of the Impacts of Genetically Modified Crops
Source: PubMed Central journal article supplement (PMC4218791; doi:10.1371/journal.pone.0111629), 2014-11-03
Supplement: pone.0111629.s005.pdf [file pone.0111629.s005.pdf]

**Table S2. Distribution of study descriptor dummy variables for different outcomes**

| <b>Variables</b>                  | <b>Yield</b> | <b>Pesticide quantity</b> | <b>Pesticide cost</b> | <b>Total cost</b> | <b>Farmer profit</b> |
|-----------------------------------|--------------|---------------------------|-----------------------|-------------------|----------------------|
| Insect resistance (0/1)           | 98/353       | 13/108                    | 48/145                | 19/96             | 17/119               |
| Developing country (0/1)          | 167/287      | 26/95                     | 49/144                | 23/92             | 29/107               |
| Field-trial data (0/1)            | 363/88       | 121/0                     | 187/6                 | 105/10            | 133/3                |
| Industry-funded study (0/1)       | 430/21       | 119/2                     | 186/7                 | 111/4             | 132/4                |
| Regression model result (0/1)     | 415/36       | 110/11                    | 190/3                 | 112/3             | 124/12               |
| Journal publication (0/1)         | 134/317      | 31/90                     | 67/126                | 31/84             | 42/94                |
| Journal/academic conference (0/1) | 106/345      | 14/107                    | 49/144                | 29/86             | 28/108               |
