# Supplementary material for: A Meta-Analysis of the Impacts of Genetically Modified Crops
Source: PubMed Central journal article supplement (PMC4218791; doi:10.1371/journal.pone.0111629), 2014-11-03
Supplement: pone.0111629.s007.pdf [file pone.0111629.s007.pdf]

|     |         |      |       |       |   |   |   |   |   |   |
|-----|---------|------|-------|-------|---|---|---|---|---|---|
| 144 | cotton  | 63.3 |       | 1     | 0 | 0 | 1 | 0 | 1 | 1 |
| 144 | cotton  |      |       | 1     | 0 | 0 | 1 | 0 | 1 | 1 |
| 144 | cotton  |      |       | 1     | 1 | 0 | 1 | 0 | 1 | 1 |
| 144 | cotton  |      | 105.8 | 1     | 0 | 0 | 1 | 0 | 1 | 1 |
| 144 | cotton  | 85.2 |       | 1     | 0 | 0 | 1 | 0 | 1 | 1 |
| 144 | cotton  |      |       | 1     | 0 | 0 | 1 | 0 | 1 | 1 |
| 144 | cotton  |      |       | 1     | 0 | 0 | 1 | 0 | 1 | 1 |
| 144 | cotton  |      | 18.9  | 1     | 0 | 0 | 1 | 0 | 1 | 1 |
| 144 | cotton  |      | 17.4  | 1     | 0 | 0 | 1 | 0 | 1 | 1 |
| 144 | cotton  |      |       | 1     | 0 | 0 | 1 | 0 | 1 | 1 |
| 144 | cotton  |      | -52.9 | 1     | 0 | 0 | 1 | 0 | 1 | 1 |
| 144 | cotton  |      |       | 213.2 | 1 | 0 | 0 | 1 | 0 | 1 |
| 144 | cotton  |      |       | 1     | 0 | 0 | 1 | 0 | 1 | 1 |
| 144 | cotton  |      | -63.0 | 1     | 0 | 0 | 1 | 0 | 1 | 1 |
| 207 | maize   |      |       | 1     | 0 | 0 | 0 | 0 | 1 | 1 |
| 207 | maize   |      |       | 1     | 1 | 0 | 0 | 0 | 1 | 1 |
| 207 | maize   |      | 21.8  | 1     | 0 | 0 | 0 | 0 | 1 | 1 |
| 207 | maize   |      |       | 1     | 1 | 0 | 0 | 0 | 1 | 1 |
| 207 | maize   |      |       | 1     | 1 | 0 | 0 | 0 | 1 | 1 |
| 207 | maize   |      | 0.9   | 1     | 0 | 0 | 0 | 0 | 1 | 1 |
| 207 | maize   |      |       | 1     | 0 | 0 | 0 | 0 | 1 | 1 |
| 207 | maize   |      |       | 1     | 0 | 0 | 0 | 0 | 1 | 1 |
| 207 | maize   |      | -3.4  | 1     | 0 | 0 | 0 | 0 | 1 | 1 |
| 207 | maize   |      |       | -55.9 | 1 | 0 | 0 | 0 | 0 | 1 |
| 207 | maize   |      |       | 1     | 0 | 0 | 0 | 0 | 1 | 1 |
| 207 | maize   |      | 0.0   | 1     | 0 | 0 | 0 | 0 | 1 | 1 |
| 207 | maize   |      |       | 1     | 0 | 0 | 0 | 0 | 1 | 1 |
| 207 | maize   | 10.5 |       | 1     | 0 | 0 | 0 | 0 | 1 | 1 |
| 207 | maize   |      | 0.8   | 1     | 0 | 0 | 0 | 0 | 1 | 1 |
| 207 | maize   |      |       | 1     | 0 | 0 | 0 | 0 | 1 | 1 |
| 207 | maize   | 25.0 |       | 1     | 0 | 0 | 0 | 0 | 1 | 1 |
| 207 | maize   |      |       | 1     | 0 | 0 | 0 | 0 | 1 | 1 |
| 207 | maize   |      |       | 83.3  | 1 | 0 | 0 | 0 | 0 | 1 |
| 207 | maize   |      |       | 1     | 0 | 0 | 0 | 0 | 1 | 1 |
| 207 | maize   |      |       | 1     | 0 | 0 | 0 | 0 | 1 | 1 |
| 207 | maize   |      |       | 1     | 0 | 0 | 0 | 0 | 1 | 1 |
| 207 | maize   |      |       | 71.9  | 1 | 0 | 0 | 0 | 0 | 1 |
| 207 | maize   |      |       | 1     | 0 | 0 | 0 | 0 | 1 | 1 |
| 207 | maize   |      |       | 1     | 1 | 0 | 0 | 0 | 1 | 1 |
| 207 | maize   |      | -0.7  | 1     | 0 | 0 | 0 | 0 | 1 | 1 |
| 207 | maize   |      | 0.0   | 1     | 0 | 0 | 0 | 0 | 1 | 1 |
| 207 | maize   |      |       | 154.1 | 1 | 0 | 0 | 0 | 0 | 1 |
| 207 | maize   |      |       | 13.1  | 1 | 0 | 0 | 0 | 0 | 1 |
| 207 | maize   | 11.1 |       | 1     | 0 | 0 | 0 | 0 | 1 | 1 |
| 207 | maize   |      |       | 1     | 0 | 0 | 0 | 0 | 1 | 1 |
| 207 | maize   |      |       | -68.5 | 1 | 0 | 0 | 0 | 0 | 1 |
| 207 | maize   |      | -0.7  | 1     | 0 | 0 | 0 | 0 | 1 | 1 |
| 207 | maize   |      | 0.0   | 1     | 0 | 0 | 0 | 0 | 1 | 1 |
| 207 | maize   |      |       | 30.0  | 1 | 0 | 0 | 0 | 0 | 1 |
| 207 | maize   |      |       | 1     | 0 | 0 | 0 | 0 | 1 | 1 |
| 207 | maize   | 14.5 |       | 1     | 0 | 0 | 0 | 0 | 1 | 1 |
| 207 | maize   |      | 0.0   | 1     | 0 | 0 | 0 | 0 | 1 | 1 |
| 207 | maize   | 16.7 |       | 1     | 0 | 0 | 0 | 0 | 1 | 1 |
| 207 | maize   |      |       | 1     | 0 | 0 | 0 | 0 | 1 | 1 |
| 207 | maize   |      |       | 58.9  | 1 | 0 | 0 | 0 | 0 | 1 |
| 207 | maize   |      |       | 45.2  | 1 | 0 | 0 | 0 | 0 | 1 |
| 207 | maize   |      |       | 1     | 1 | 0 | 0 | 0 | 1 | 1 |
| 207 | maize   |      | 0.0   | 1     | 0 | 0 | 0 | 0 | 1 | 1 |
| 207 | maize   |      |       | 1     | 0 | 0 | 0 | 0 | 1 | 1 |
| 215 | soybean | 12.0 |       | 0     | 0 | 1 | 0 | 1 | 1 | 1 |
| 215 | soybean | 10.6 |       | 0     | 0 | 1 | 0 | 1 | 1 | 1 |
| 215 | soybean | 7.4  |       | 0     | 0 | 1 | 0 | 1 | 1 | 1 |
| 215 | soybean | 3.7  |       | 0     | 0 | 1 | 0 | 1 | 1 | 1 |
| 215 | soybean | 12.0 |       | 0     | 0 | 1 | 0 | 1 | 1 | 1 |
| 215 | soybean | 16.9 |       | 0     | 0 | 1 | 0 | 1 | 1 | 1 |
| 215 | soybean | 2.0  |       | 0     | 0 | 1 | 0 | 1 | 1 | 1 |
| 215 | soybean | 12.7 |       | 0     | 0 | 1 | 0 | 1 | 1 | 1 |

|     |         |       |       |       |   |   |   |   |   |   |   |
|-----|---------|-------|-------|-------|---|---|---|---|---|---|---|
| 215 | soybean | 2.3   |       |       | 0 | 0 | 1 | 0 | 1 | 1 | 1 |
| 215 | soybean | 2.0   |       |       | 0 | 0 | 1 | 0 | 1 | 1 | 1 |
| 242 | cotton  | 25.6  |       |       | 1 | 0 | 0 | 1 | 1 | 1 | 1 |
| 242 | cotton  | 52.6  |       |       | 1 | 0 | 0 | 1 | 1 | 1 | 1 |
| 242 | cotton  | 60.4  |       |       | 1 | 0 | 0 | 1 | 1 | 1 | 1 |
| 270 | cotton  |       | -66.1 |       | 1 | 0 | 0 | 1 | 0 | 1 | 1 |
| 312 | soybean | 0.6   |       |       | 0 | 0 | 0 | 0 | 1 | 1 | 1 |
| 334 | cotton  | 21.8  |       |       | 1 | 0 | 0 | 0 | 1 | 1 | 1 |
| 334 | cotton  | 2.5   |       |       | 1 | 0 | 0 | 0 | 1 | 1 | 1 |
| 334 | cotton  |       |       |       | 1 | 0 | 0 | 0 | 1 | 1 | 1 |
| 334 | cotton  | -2.0  |       |       | 1 | 0 | 0 | 0 | 1 | 1 | 1 |
| 334 | cotton  |       |       |       | 1 | 0 | 0 | 0 | 1 | 1 | 1 |
| 334 | cotton  |       |       |       | 1 | 0 | 0 | 0 | 1 | 1 | 1 |
| 334 | cotton  | 18.8  |       |       | 1 | 0 | 0 | 0 | 1 | 1 | 1 |
| 334 | cotton  |       |       |       | 1 | 0 | 0 | 0 | 1 | 1 | 1 |
| 334 | cotton  | 34.4  |       |       | 1 | 0 | 0 | 0 | 1 | 1 | 1 |
| 334 | cotton  |       |       |       | 1 | 0 | 0 | 0 | 1 | 1 | 1 |
| 334 | cotton  |       |       |       | 1 | 0 | 0 | 0 | 1 | 1 | 1 |
| 334 | cotton  |       |       |       | 1 | 0 | 0 | 0 | 1 | 1 | 1 |
| 334 | cotton  |       |       |       | 1 | 0 | 0 | 0 | 1 | 1 | 1 |
| 334 | cotton  | 13.5  |       |       | 1 | 0 | 0 | 0 | 1 | 1 | 1 |
| 334 | cotton  | 7.2   |       |       | 1 | 0 | 0 | 0 | 1 | 1 | 1 |
| 334 | cotton  | 15.7  |       |       | 1 | 0 | 0 | 0 | 1 | 1 | 1 |
| 334 | cotton  | 19.1  |       |       | 1 | 0 | 0 | 0 | 1 | 1 | 1 |
| 334 | cotton  |       |       |       | 1 | 0 | 0 | 0 | 1 | 1 | 1 |
| 396 | maize   | 1.1   |       |       | 1 | 0 | 0 | 0 | 1 | 1 | 1 |
| 396 | maize   | 1.4   |       |       | 1 | 0 | 0 | 0 | 1 | 1 | 1 |
| 504 | maize   |       |       |       | 1 | 1 | 0 | 0 | 0 | 1 | 1 |
| 504 | maize   |       |       | -1.3  | 1 | 0 | 0 | 0 | 0 | 1 | 1 |
| 504 | maize   |       |       |       | 1 | 0 | 0 | 0 | 0 | 1 | 1 |
| 504 | maize   |       |       | 14.4  | 1 | 0 | 0 | 0 | 0 | 1 | 1 |
| 504 | maize   |       |       |       | 1 | 0 | 0 | 0 | 0 | 1 | 1 |
| 527 | soybean | 17.0  |       |       | 0 | 0 | 0 | 0 | 1 | 1 | 1 |
| 527 | soybean | 8.3   |       |       | 0 | 0 | 0 | 0 | 1 | 1 | 1 |
| 527 | soybean | 55.6  |       |       | 0 | 0 | 0 | 0 | 1 | 1 | 1 |
| 639 | soybean |       |       | -5.2  | 0 | 0 | 0 | 0 | 0 | 0 | 0 |
| 639 | soybean | 28.8  |       |       | 0 | 0 | 0 | 0 | 0 | 0 | 0 |
| 639 | soybean |       |       | -8.9  | 0 | 0 | 0 | 0 | 0 | 0 | 0 |
| 639 | soybean | -4.3  |       |       | 0 | 0 | 0 | 0 | 0 | 0 | 0 |
| 643 | soybean |       |       | 12.1  | 0 | 0 | 1 | 0 | 1 | 1 | 1 |
| 643 | soybean |       |       | -2.2  | 0 | 0 | 1 | 0 | 1 | 1 | 1 |
| 643 | soybean | 1.7   |       |       | 0 | 0 | 1 | 0 | 1 | 1 | 1 |
| 768 | soybean | 18.7  |       |       | 0 | 0 | 0 | 0 | 1 | 1 | 1 |
| 768 | soybean |       |       | -34.2 | 0 | 0 | 0 | 0 | 1 | 1 | 1 |
| 768 | soybean | -10.9 |       |       | 0 | 0 | 0 | 0 | 1 | 1 | 1 |
| 768 | soybean |       |       | -27.9 | 0 | 0 | 0 | 0 | 1 | 1 | 1 |
| 768 | soybean |       |       | -7.4  | 0 | 0 | 0 | 0 | 1 | 1 | 1 |
| 768 | soybean | 9.6   |       |       | 0 | 0 | 0 | 0 | 1 | 1 | 1 |
| 768 | soybean |       |       |       | 0 | 1 | 0 | 0 | 1 | 1 | 1 |
| 768 | soybean | -20.0 |       |       | 0 | 0 | 0 | 0 | 1 | 1 | 1 |
| 768 | soybean |       |       |       | 0 | 1 | 0 | 0 | 1 | 1 | 1 |
| 768 | soybean |       |       |       | 0 | 1 | 0 | 0 | 1 | 1 | 1 |
| 768 | soybean |       |       | -20.9 | 0 | 0 | 0 | 0 | 1 | 1 | 1 |
| 768 | soybean |       |       |       | 0 | 1 | 0 | 0 | 1 | 1 | 1 |
| 768 | soybean | 1.1   |       |       | 0 | 0 | 0 | 0 | 1 | 1 | 1 |
| 768 | soybean | -6.6  |       |       | 0 | 0 | 0 | 0 | 1 | 1 | 1 |
| 768 | soybean |       |       |       |   | 1 | 0 | 0 | 1 | 1 | 1 |
| 768 | soybean |       |       |       | 0 | 1 | 0 | 0 | 1 | 1 | 1 |
| 768 | soybean |       |       | -9.7  | 0 | 0 | 0 | 0 | 1 | 1 | 1 |
| 768 | soybean |       |       |       | 0 | 1 | 0 | 0 | 1 | 1 | 1 |
| 768 | soybean |       |       |       |   | 1 | 0 | 0 | 1 | 1 | 1 |
| 768 | soybean |       |       |       | 1 | 0 | 0 | 0 | 1 | 1 | 1 |
| 768 | soybean |       |       | -14.3 | 0 | 0 | 0 | 0 | 1 | 1 | 1 |
| 768 | soybean | -16.6 |       |       | 0 | 0 | 0 | 0 | 1 | 1 | 1 |
| 768 | soybean |       |       | -2.8  | 0 | 0 | 0 | 0 | 1 | 1 | 1 |
| 768 | soybean |       |       | -11.8 | 0 | 0 | 0 | 0 | 1 | 1 | 1 |

|      |         |       |       |      |   |   |   |   |   |   |
|------|---------|-------|-------|------|---|---|---|---|---|---|
| 768  | soybean |       |       | 0    | 1 | 0 | 0 | 1 | 1 | 1 |
| 768  | soybean | 26.4  |       | 0    | 0 | 0 | 0 | 1 | 1 | 1 |
| 768  | soybean |       |       | 0    | 1 | 0 | 0 | 1 | 1 | 1 |
| 804  | cotton  |       | -82.2 | 1    | 0 | 0 | 1 | 0 | 1 | 1 |
| 804  | cotton  |       |       | 1    | 0 | 0 | 1 | 0 | 1 | 1 |
| 804  | cotton  | 5.8   |       | 1    | 0 | 0 | 1 | 0 | 1 | 1 |
| 804  | cotton  |       | -80.6 | 1    | 0 | 0 | 1 | 0 | 1 | 1 |
| 856  | soybean |       |       | 0    | 0 | 0 | 1 | 1 | 1 | 1 |
| 856  | soybean |       | -86.8 | 0    | 0 | 0 | 1 | 1 | 1 | 1 |
| 856  | soybean |       |       | 0    | 0 | 0 | 1 | 1 | 1 | 1 |
| 962  | cotton  |       |       | 1    | 0 | 0 | 0 | 0 | 1 | 1 |
| 962  | cotton  | -4.0  |       | 0    | 0 | 0 | 0 | 0 | 1 | 1 |
| 962  | cotton  |       | 0.6   | 1    | 0 | 0 | 0 | 0 | 1 | 1 |
| 962  | soybean |       |       | 0    | 0 | 0 | 0 | 0 | 1 | 1 |
| 962  | soybean |       | -23.6 | 0    | 0 | 0 | 0 | 0 | 1 | 1 |
| 962  | soybean | 18.2  |       | 0    | 0 | 0 | 0 | 0 | 1 | 1 |
| 962  | cotton  |       | -12.8 | 0    | 0 | 0 | 0 | 0 | 1 | 1 |
| 962  | cotton  |       |       | 0    | 0 | 0 | 0 | 0 | 1 | 1 |
| 962  | cotton  |       |       | 1    | 0 | 0 | 0 | 0 | 1 | 1 |
| 962  | cotton  |       |       | 0    | 0 | 0 | 0 | 0 | 1 | 1 |
| 962  | soybean |       |       | 0    | 0 | 0 | 0 | 0 | 1 | 1 |
| 962  | cotton  |       |       | 0    | 0 | 0 | 0 | 0 | 1 | 1 |
| 962  | cotton  |       | -14.5 | 1    | 0 | 0 | 0 | 0 | 1 | 1 |
| 962  | cotton  | 6.1   |       | 1    | 0 | 0 | 0 | 0 | 1 | 1 |
| 962  | soybean |       |       | 0    | 0 | 0 | 0 | 0 | 1 | 1 |
| 962  | cotton  |       |       | 0    | 0 | 0 | 0 | 0 | 1 | 1 |
| 962  | soybean | 15.4  |       | 0    | 0 | 0 | 0 | 0 | 1 | 1 |
| 962  | soybean | 13.0  |       | 0    | 0 | 0 | 0 | 0 | 1 | 1 |
| 962  | cotton  | -7.9  |       | 1    | 0 | 0 | 0 | 0 | 1 | 1 |
| 962  | soybean |       |       | 0    | 0 | 0 | 0 | 0 | 1 | 1 |
| 962  | cotton  | -10.4 |       | 0    | 0 | 0 | 0 | 0 | 1 | 1 |
| 962  | soybean |       | -27.8 | 0    | 0 | 0 | 0 | 0 | 1 | 1 |
| 962  | cotton  |       | -22.5 | 0    | 0 | 0 | 0 | 0 | 1 | 1 |
| 962  | soybean |       | -33.0 | 0    | 0 | 0 | 0 | 0 | 1 | 1 |
| 962  | soybean | -14.7 |       | 0    | 0 | 0 | 0 | 0 | 1 | 1 |
| 962  | soybean |       | -41.4 | 0    | 0 | 0 | 0 | 0 | 1 | 1 |
| 1018 | soybean |       |       |      | 1 | 0 | 0 | 1 | 0 | 0 |
| 1018 | soybean |       |       |      | 1 | 0 | 0 | 1 | 0 | 0 |
| 1018 | soybean | -5.3  |       | 0    | 0 | 0 | 0 | 1 | 0 | 0 |
| 1018 | soybean | -5.9  |       | 0    | 0 | 0 | 0 | 1 | 0 | 0 |
| 1018 | soybean | -2.8  |       | 0    | 0 | 0 | 0 | 1 | 0 | 0 |
| 1018 | soybean |       |       |      | 1 | 0 | 0 | 1 | 0 | 0 |
| 1018 | soybean | -13.1 |       | 0    | 0 | 0 | 0 | 1 | 0 | 0 |
| 1018 | soybean |       |       |      | 1 | 0 | 0 | 1 | 0 | 0 |
| 1092 | soybean |       |       | 0    | 0 | 0 | 1 | 0 | 1 | 1 |
| 1092 | soybean |       |       | 0    | 1 | 0 | 1 | 0 | 1 | 1 |
| 1092 | soybean |       |       | 0    | 0 | 0 | 1 | 0 | 1 | 1 |
| 1092 | soybean |       |       | 0    | 1 | 0 | 1 | 0 | 1 | 1 |
| 1097 | cotton  | -9.1  |       | 1    | 0 | 0 | 1 | 0 | 1 | 1 |
| 1100 | cotton  |       |       | 6.7  | 1 | 0 | 0 | 0 | 1 | 1 |
| 1100 | cotton  | -55.4 |       | 1    | 0 | 0 | 0 | 0 | 1 | 1 |
| 1100 | cotton  |       |       | 74.2 | 1 | 0 | 0 | 0 | 1 | 1 |
| 1100 | cotton  |       | -76.2 | 1    | 0 | 0 | 0 | 0 | 1 | 1 |
| 1103 | maize   | 38.2  |       | 0    | 0 | 0 | 1 | 0 | 1 | 1 |
| 1103 | maize   |       |       | 1    | 0 | 0 | 1 | 0 | 1 | 1 |
| 1103 | maize   |       |       | 1    | 0 | 0 | 1 | 0 | 1 | 1 |
| 1103 | maize   | 1.8   |       | 1    | 0 | 0 | 1 | 0 | 1 | 1 |
| 1103 | maize   |       |       | 0    | 0 | 0 | 1 | 0 | 1 | 1 |
| 1103 | maize   |       |       | 0    | 0 | 0 | 1 | 0 | 1 | 1 |
| 1103 | maize   |       |       | 0    | 0 | 0 | 1 | 0 | 1 | 1 |
| 1103 | maize   |       |       | 0    | 0 | 0 | 1 | 0 | 1 | 1 |
| 1103 | maize   |       |       | 0    | 0 | 0 | 1 | 0 | 1 | 1 |
| 1103 | maize   |       |       | 0    | 0 | 0 | 1 | 0 | 1 | 1 |
| 1103 | maize   |       | -29.0 | 1    | 0 | 0 | 1 | 0 | 1 | 1 |
| 1103 | maize   |       |       | 1    | 0 | 0 | 1 | 0 | 1 | 1 |
| 1103 | maize   |       |       | 1    | 0 | 0 | 1 | 0 | 1 | 1 |



|      |         |      |       |   |   |   |   |   |   |   |
|------|---------|------|-------|---|---|---|---|---|---|---|
| 1141 | cotton  |      | 2.1   | 1 | 0 | 0 | 1 | 0 | 1 | 1 |
| 1141 | cotton  |      |       | 1 | 0 | 0 | 1 | 0 | 1 | 1 |
| 1141 | cotton  | 39.1 |       | 1 | 1 | 0 | 1 | 0 | 1 | 1 |
| 1141 | cotton  | 62.8 |       | 1 | 0 | 0 | 1 | 0 | 1 | 1 |
| 1141 | cotton  |      |       | 1 | 0 | 0 | 1 | 0 | 1 | 1 |
| 1141 | cotton  |      |       | 1 | 0 | 0 | 1 | 0 | 1 | 1 |
| 1141 | cotton  |      | 14.7  | 1 | 0 | 0 | 1 | 0 | 1 | 1 |
| 1141 | cotton  | 45.0 |       | 1 | 0 | 0 | 1 | 0 | 1 | 1 |
| 1141 | cotton  |      | -83.3 | 1 | 0 | 0 | 1 | 0 | 1 | 1 |
| 1147 | maize   |      |       | 0 | 0 | 0 | 0 | 0 | 1 | 1 |
| 1147 | soybean |      |       | 0 | 0 | 0 | 0 | 0 | 1 | 1 |
| 1147 | soybean |      |       | 0 | 1 | 0 | 0 | 0 | 1 | 1 |
| 1147 | cotton  |      |       | 0 | 1 | 0 | 0 | 0 | 1 | 1 |
| 1147 | soybean |      |       | 0 | 1 | 0 | 0 | 0 | 1 | 1 |
| 1147 | cotton  |      |       | 0 | 0 | 0 | 0 | 0 | 1 | 1 |
| 1147 | cotton  |      |       | 0 | 1 | 0 | 0 | 0 | 1 | 1 |
| 1159 | maize   | 31.0 |       | 1 | 0 | 0 | 1 | 0 | 1 | 1 |
| 1159 | maize   | -3.0 |       | 0 | 0 | 0 | 1 | 0 | 1 | 1 |
| 1159 | maize   | 21.0 |       | 0 | 0 | 0 | 1 | 0 | 1 | 1 |
| 1159 | maize   | 32.0 |       | 1 | 0 | 0 | 1 | 0 | 1 | 1 |
| 1159 | maize   | 9.3  |       | 0 | 0 | 0 | 1 | 0 | 1 | 1 |
| 1159 | maize   | 14.0 |       | 1 | 0 | 0 | 1 | 0 | 1 | 1 |
| 1159 | maize   | 4.0  |       | 1 | 0 | 0 | 1 | 0 | 1 | 1 |
| 1159 | maize   | 32.0 |       | 0 | 0 | 0 | 1 | 0 | 1 | 1 |
| 1159 | maize   | 94.0 |       | 0 | 0 | 0 | 1 | 0 | 1 | 1 |
| 1159 | maize   | 11.9 |       | 0 | 0 | 0 | 1 | 0 | 1 | 1 |
| 1159 | maize   | 10.0 |       | 0 | 0 | 0 | 1 | 0 | 1 | 1 |
| 1159 | maize   | 25.0 |       | 1 | 0 | 0 | 1 | 0 | 1 | 1 |
| 1159 | maize   |      |       |   | 1 | 0 | 1 | 0 | 1 | 1 |
| 1159 | maize   | 29.0 |       | 1 | 0 | 0 | 1 | 0 | 1 | 1 |
| 1159 | maize   | 4.2  |       | 1 | 0 | 0 | 1 | 0 | 1 | 1 |
| 1159 | maize   | 10.3 |       | 0 | 0 | 0 | 1 | 0 | 1 | 1 |
| 1159 | maize   | 94.0 |       | 0 | 0 | 0 | 1 | 0 | 1 | 1 |
| 1159 | maize   | 10.1 |       | 0 | 0 | 0 | 1 | 0 | 1 | 1 |
| 1159 | maize   | 22.0 |       | 1 | 0 | 0 | 1 | 0 | 1 | 1 |
| 1159 | maize   | 21.0 |       | 1 | 0 | 0 | 1 | 0 | 1 | 1 |
| 1159 | maize   | 8.0  |       | 0 | 0 | 0 | 1 | 0 | 1 | 1 |
| 1159 | maize   | 21.0 |       | 1 | 0 | 0 | 1 | 0 | 1 | 1 |
| 1159 | maize   | 12.0 |       | 0 | 0 | 0 | 1 | 0 | 1 | 1 |
| 1159 | maize   | 9.0  |       | 0 | 0 | 0 | 1 | 0 | 1 | 1 |
| 1159 | maize   | 10.0 |       | 0 | 0 | 0 | 1 | 0 | 1 | 1 |
| 1159 | maize   | 16.0 |       | 1 | 0 | 0 | 1 | 0 | 1 | 1 |
| 1159 | maize   | 8.0  |       | 1 | 0 | 0 | 1 | 0 | 1 | 1 |
| 1159 | maize   | 33.0 |       | 0 | 0 | 0 | 1 | 0 | 1 | 1 |
| 1159 | maize   | 22.0 |       | 1 | 0 | 0 | 1 | 0 | 1 | 1 |
| 1163 | cotton  | 33.0 |       | 1 | 0 | 0 | 1 | 0 | 1 | 1 |
| 1163 | cotton  |      |       |   | 1 | 0 | 1 | 0 | 1 | 1 |
| 1163 | cotton  |      |       |   | 1 | 0 | 1 | 0 | 1 | 1 |
| 1163 | cotton  |      |       |   | 1 | 0 | 1 | 0 | 1 | 1 |
| 1163 | cotton  |      | -77.0 | 1 | 0 | 0 | 1 | 0 | 1 | 1 |
| 1163 | cotton  |      |       |   | 1 | 0 | 1 | 0 | 1 | 1 |
| 1163 | cotton  | 34.0 |       | 1 | 0 | 0 | 1 | 0 | 1 | 1 |
| 1163 | cotton  |      | -33.0 | 1 | 0 | 0 | 1 | 0 | 1 | 1 |
| 1163 | cotton  | 24.0 |       | 1 | 0 | 0 | 1 | 0 | 1 | 1 |
| 1163 | cotton  |      | -47.0 | 1 | 0 | 0 | 1 | 0 | 1 | 1 |
| 1163 | cotton  |      | -65.0 | 1 | 0 | 0 | 1 | 0 | 1 | 1 |
| 1163 | cotton  |      |       |   | 1 | 0 | 1 | 0 | 1 | 1 |
| 1163 | cotton  |      |       |   | 1 | 0 | 1 | 0 | 1 | 1 |
| 1163 | cotton  |      |       |   | 1 | 0 | 1 | 0 | 1 | 1 |
| 1163 | cotton  |      |       |   | 1 | 0 | 1 | 0 | 1 | 1 |
| 1163 | cotton  | 9.0  |       | 1 | 0 | 0 | 1 | 0 | 1 | 1 |
| 1163 | cotton  | 22.0 |       | 1 | 0 | 0 | 1 | 0 | 1 | 1 |
| 1163 | cotton  |      |       |   | 1 | 0 | 1 | 0 | 1 | 1 |
| 1163 | cotton  |      |       |   | 1 | 0 | 1 | 0 | 1 | 1 |
| 1163 | cotton  |      | -41.0 | 1 | 0 | 0 | 1 | 0 | 1 | 1 |
| 1164 | cotton  | 49.5 |       | 1 | 0 | 0 | 1 | 0 | 1 | 1 |
| 1164 | cotton  |      |       | 1 | 0 | 0 | 1 | 0 | 1 | 1 |







|      |         |       |       |       |   |   |   |   |   |   |   |
|------|---------|-------|-------|-------|---|---|---|---|---|---|---|
| 1194 | cotton  |       |       | 1     | 0 | 0 | 1 | 0 | 1 | 1 |   |
| 1194 | cotton  |       |       | 1     | 0 | 0 | 1 | 0 | 1 | 1 |   |
| 1194 | cotton  |       |       | 1     | 0 | 0 | 1 | 0 | 1 | 1 |   |
| 1194 | cotton  |       |       | 1     | 1 | 0 | 1 | 0 | 1 | 1 |   |
| 1194 | cotton  |       | -63.0 | 1     | 0 | 0 | 1 | 0 | 1 | 1 |   |
| 1194 | cotton  |       | -12.4 | 1     | 0 | 0 | 1 | 0 | 1 | 1 |   |
| 1194 | cotton  |       | -17.6 | 1     | 0 | 0 | 1 | 0 | 1 | 1 |   |
| 1194 | cotton  |       |       | 1     | 0 | 0 | 1 | 0 | 1 | 1 |   |
| 1194 | cotton  |       | -4.3  | 1     | 0 | 0 | 1 | 0 | 1 | 1 |   |
| 1194 | cotton  |       |       | 1     | 0 | 0 | 1 | 0 | 1 | 1 |   |
| 1194 | cotton  |       |       | 1     | 0 | 0 | 1 | 0 | 1 | 1 |   |
| 1194 | cotton  | 55.4  |       | 1     | 0 | 0 | 1 | 0 | 1 | 1 |   |
| 1194 | cotton  | 100.5 |       | 1     | 0 | 0 | 1 | 0 | 1 | 1 |   |
| 1194 | cotton  |       | -77.8 | 1     | 0 | 0 | 1 | 0 | 1 | 1 |   |
| 1194 | cotton  |       |       | 1     | 1 | 0 | 1 | 0 | 1 | 1 |   |
| 1194 | cotton  |       |       | 1     | 0 | 0 | 1 | 0 | 1 | 1 |   |
| 1194 | cotton  |       | -53.2 | 1     | 0 | 0 | 1 | 0 | 1 | 1 |   |
| 1194 | cotton  |       |       | 1     | 0 | 0 | 1 | 0 | 1 | 1 |   |
| 1194 | cotton  |       |       | 1     | 0 | 0 | 1 | 0 | 1 | 1 |   |
| 1194 | cotton  |       | 18.9  | 1     | 0 | 0 | 1 | 0 | 1 | 1 |   |
| 1194 | cotton  |       |       | 1     | 0 | 0 | 1 | 0 | 1 | 1 |   |
| 1194 | cotton  |       | 17.4  | 1     | 0 | 0 | 1 | 0 | 1 | 1 |   |
| 1195 | cotton  | 20.0  |       | 1     | 0 | 0 | 0 | 1 | 1 | 1 |   |
| 1195 | cotton  |       | -66.7 | 1     | 0 | 0 | 0 | 1 | 1 | 1 |   |
| 1199 | soybean | 29.2  |       | 0     | 0 | 1 | 0 | 0 | 1 | 1 |   |
| 1199 | soybean |       | -83.6 | 0     | 0 | 1 | 0 | 0 | 1 | 1 |   |
| 1199 | soybean | 33.3  |       | 0     | 0 | 1 | 0 | 0 | 1 | 1 |   |
| 1199 | soybean |       | -18.7 | 0     | 0 | 1 | 0 | 0 | 1 | 1 |   |
| 1199 | soybean |       |       | 127.2 | 0 | 0 | 1 | 0 | 0 | 1 | 1 |
| 1199 | soybean |       |       | 0     | 0 | 1 | 0 | 0 | 1 | 1 |   |
| 1199 | soybean | 34.8  |       | 0     | 0 | 1 | 0 | 0 | 1 | 1 |   |
| 1199 | soybean |       |       | 0     | 0 | 1 | 0 | 0 | 1 | 1 |   |
| 1199 | soybean |       |       | 0     | 0 | 1 | 0 | 0 | 1 | 1 |   |
| 1199 | soybean |       |       | 183.9 | 0 | 0 | 1 | 0 | 0 | 1 | 1 |
| 1199 | soybean |       |       | 0     | 0 | 1 | 0 | 0 | 1 | 1 |   |
| 1199 | soybean |       | -16.5 | 0     | 0 | 1 | 0 | 0 | 1 | 1 |   |
| 1199 | soybean |       |       | 185.4 | 0 | 0 | 1 | 0 | 0 | 1 | 1 |
| 1199 | soybean |       |       | 0     | 0 | 1 | 0 | 0 | 1 | 1 |   |
| 1199 | soybean |       |       | 0     | 0 | 1 | 0 | 0 | 1 | 1 |   |
| 1199 | soybean |       | -43.1 | 0     | 0 | 1 | 0 | 0 | 1 | 1 |   |
| 1205 | maize   | 54.4  |       | 1     | 0 | 0 | 1 | 0 | 1 | 1 |   |
| 1205 | maize   |       |       | 1     | 1 | 0 | 1 | 0 | 1 | 1 |   |
| 1205 | maize   |       |       | 1     | 1 | 0 | 1 | 0 | 1 | 1 |   |
| 1205 | maize   |       |       | 1     | 1 | 0 | 1 | 0 | 1 | 1 |   |
| 1205 | maize   |       |       | 1     | 1 | 0 | 1 | 0 | 1 | 1 |   |
| 1205 | maize   | 54.9  |       | 1     | 0 | 0 | 1 | 0 | 1 | 1 |   |
| 1205 | maize   |       |       | 1     | 1 | 0 | 1 | 0 | 1 | 1 |   |
| 1205 | maize   |       |       | 1     | 1 | 0 | 1 | 0 | 1 | 1 |   |
| 1205 | maize   |       |       | 1     | 1 | 0 | 1 | 0 | 1 | 1 |   |
| 1205 | maize   | 96.8  |       | 1     | 0 | 0 | 1 | 0 | 1 | 1 |   |
| 1205 | maize   | 62.0  |       | 1     | 0 | 0 | 1 | 0 | 1 | 1 |   |
| 1205 | maize   | 21.0  |       | 1     | 0 | 0 | 1 | 0 | 1 | 1 |   |
| 1205 | maize   | 30.0  |       | 1     | 0 | 0 | 1 | 0 | 1 | 1 |   |
| 1205 | maize   | 62.0  |       | 1     | 0 | 0 | 1 | 0 | 1 | 1 |   |
| 1205 | maize   | 34.0  |       | 1     | 0 | 0 | 1 | 0 | 1 | 1 |   |
| 1205 | maize   | 52.3  |       | 1     | 0 | 0 | 1 | 0 | 1 | 1 |   |
| 1205 | maize   | 32.0  |       | 1     | 0 | 0 | 1 | 0 | 1 | 1 |   |
| 1205 | maize   | 26.0  |       | 1     | 0 | 0 | 1 | 0 | 1 | 1 |   |
| 1205 | maize   |       |       | 1     | 1 | 0 | 1 | 0 | 1 | 1 |   |
| 1205 | maize   | 85.4  |       | 1     | 0 | 0 | 1 | 0 | 1 | 1 |   |
| 1213 | maize   |       |       | 0     | 1 | 1 | 0 | 0 | 1 | 1 |   |
| 1213 | cotton  |       |       | 0     | 1 | 1 | 0 | 0 | 1 | 1 |   |
| 1213 | soybean |       |       | 0     | 1 | 1 | 0 | 0 | 1 | 1 |   |
| 1215 | maize   |       |       | 1     | 0 | 0 | 1 | 0 | 1 | 1 |   |
| 1215 | maize   | 25.5  |       | 1     | 0 | 0 | 1 | 0 | 1 | 1 |   |
| 1215 | maize   |       |       | 1     | 0 | 0 | 1 | 0 | 1 | 1 |   |
| 1215 | maize   |       |       | 1     | 0 | 0 | 1 | 0 | 1 | 1 |   |



|      |         |       |       |       |        |   |   |   |   |   |   |   |
|------|---------|-------|-------|-------|--------|---|---|---|---|---|---|---|
| 1243 | cotton  |       |       | 1.3   | 1      | 0 | 0 | 1 | 0 | 1 | 1 |   |
| 1243 | cotton  |       | -58.1 |       | 1      | 0 | 0 | 1 | 0 | 1 | 1 |   |
| 1243 | cotton  |       |       |       | 1      | 0 | 0 | 1 | 0 | 1 | 1 |   |
| 1243 | cotton  |       |       |       | 1      | 0 | 0 | 1 | 0 | 1 | 1 |   |
| 1243 | cotton  |       |       |       | 1      | 0 | 0 | 1 | 0 | 1 | 1 |   |
| 1243 | cotton  |       | -62.4 |       | 1      | 0 | 0 | 1 | 0 | 1 | 1 |   |
| 1243 | cotton  |       |       |       | 1      | 0 | 0 | 1 | 0 | 1 | 1 |   |
| 1255 | cotton  |       |       | -47.6 | 1      | 0 | 0 | 1 | 0 | 1 | 1 |   |
| 1255 | cotton  |       |       | -57.1 | 1      | 0 | 0 | 1 | 0 | 1 | 1 |   |
| 1255 | cotton  |       |       |       | 1      | 0 | 0 | 1 | 0 | 1 | 1 |   |
| 1255 | cotton  |       |       | -7.0  | 1      | 0 | 0 | 1 | 0 | 1 | 1 |   |
| 1255 | cotton  | 45.3  |       |       | 1      | 0 | 0 | 1 | 0 | 1 | 1 |   |
| 1255 | cotton  | 63.0  |       |       | 1      | 0 | 0 | 1 | 0 | 1 | 1 |   |
| 1255 | cotton  |       |       |       | 1      | 0 | 0 | 1 | 0 | 1 | 1 |   |
| 1255 | cotton  |       |       |       | 1      | 0 | 0 | 1 | 0 | 1 | 1 |   |
| 1255 | cotton  |       |       |       | 1      | 0 | 0 | 1 | 0 | 1 | 1 |   |
| 1255 | cotton  |       |       | -32.3 | 1      | 0 | 0 | 1 | 0 | 1 | 1 |   |
| 1266 | cotton  | 19.6  |       |       | 1      | 0 | 0 | 0 | 0 | 1 | 1 |   |
| 1266 | cotton  | -11.9 |       |       | 0      | 0 | 0 | 0 | 0 | 1 | 1 |   |
| 1266 | cotton  |       |       | 5.0   | 1      | 0 | 0 | 0 | 0 | 1 | 1 |   |
| 1266 | cotton  |       |       | 59.9  | 1      | 0 | 0 | 0 | 0 | 1 | 1 |   |
| 1266 | cotton  |       |       | -84.1 | 1      | 0 | 0 | 0 | 0 | 1 | 1 |   |
| 1266 | cotton  | 8.6   |       |       | 1      | 0 | 0 | 0 | 0 | 1 | 1 |   |
| 1266 | cotton  |       |       | -22.5 | 0      | 0 | 0 | 0 | 0 | 1 | 1 |   |
| 1266 | cotton  |       |       | -23.4 | 0      | 0 | 0 | 0 | 0 | 1 | 1 |   |
| 1266 | cotton  |       |       | -57.5 | 1      | 0 | 0 | 0 | 0 | 1 | 1 |   |
| 1266 | cotton  | 15.0  |       |       | 1      | 0 | 0 | 0 | 0 | 1 | 1 |   |
| 1266 | cotton  | 26.1  |       |       | 1      | 0 | 0 | 0 | 0 | 1 | 1 |   |
| 1266 | cotton  |       |       | -22.9 | 1      | 0 | 0 | 0 | 0 | 1 | 1 |   |
| 1268 | cotton  |       |       |       | 1      | 0 | 0 | 1 | 0 | 1 | 1 |   |
| 1268 | cotton  |       |       | 36.3  | 1      | 0 | 0 | 1 | 0 | 1 | 1 |   |
| 1268 | cotton  |       |       |       | 1      | 0 | 0 | 1 | 0 | 1 | 1 |   |
| 1268 | cotton  |       |       |       | 1      | 0 | 0 | 1 | 0 | 1 | 1 |   |
| 1268 | cotton  |       |       | -46.1 | 1      | 0 | 0 | 1 | 0 | 1 | 1 |   |
| 1268 | cotton  |       |       |       | 53.8   | 1 | 0 | 0 | 1 | 0 | 1 | 1 |
| 1268 | cotton  | 34.3  |       |       | 1      | 0 | 0 | 1 | 0 | 1 | 1 |   |
| 1268 | cotton  | 32.4  |       |       | 1      | 0 | 0 | 1 | 0 | 1 | 1 |   |
| 1268 | cotton  |       |       |       | 33.6   | 1 | 0 | 0 | 1 | 0 | 1 | 1 |
| 1268 | cotton  |       |       |       | 1      | 0 | 0 | 1 | 0 | 1 | 1 |   |
| 1268 | cotton  |       |       |       | 28.9   | 1 | 0 | 0 | 1 | 0 | 1 | 1 |
| 1278 | soybean |       |       |       | 0      | 1 | 0 | 0 | 0 | 1 | 1 |   |
| 1278 | soybean |       |       |       | 0      | 1 | 0 | 0 | 0 | 1 | 1 |   |
| 1291 | soybean |       |       |       |        | 1 | 0 | 0 | 0 | 1 | 1 |   |
| 1291 | soybean |       |       |       | 0      | 0 | 0 | 0 | 0 | 1 | 1 |   |
| 1291 | soybean |       |       |       | 0      | 0 | 0 | 0 | 0 | 1 | 1 |   |
| 1291 | soybean |       |       |       |        | 1 | 0 | 0 | 0 | 1 | 1 |   |
| 1363 | soybean |       |       |       |        | 1 | 0 | 0 | 0 | 1 | 1 |   |
| 1363 | soybean |       |       |       |        | 1 | 0 | 0 | 0 | 1 | 1 |   |
| 1363 | soybean |       |       |       |        | 1 | 0 | 0 | 0 | 1 | 1 |   |
| 1363 | soybean |       |       |       | 69.6   | 0 | 1 | 0 | 0 | 0 | 1 | 1 |
| 1363 | soybean |       |       |       | 0      | 1 | 0 | 0 | 0 | 0 | 1 | 1 |
| 1363 | maize   |       |       |       | 1      | 1 | 0 | 0 | 0 | 0 | 1 | 1 |
| 1363 | soybean |       |       |       |        | 1 | 0 | 0 | 0 | 0 | 1 | 1 |
| 1363 | soybean |       |       |       |        | 1 | 0 | 0 | 0 | 0 | 1 | 1 |
| 1363 | soybean |       |       |       |        | 1 | 0 | 0 | 0 | 0 | 1 | 1 |
| 1363 | soybean |       |       |       |        | 1 | 0 | 0 | 0 | 0 | 1 | 1 |
| 1363 | maize   |       |       |       | -154.8 | 1 | 1 | 0 | 0 | 0 | 1 | 1 |
| 1363 | soybean |       |       |       |        | 1 | 0 | 0 | 0 | 0 | 1 | 1 |
| 1363 | soybean |       |       |       | 41.5   | 0 | 1 | 0 | 0 | 0 | 1 | 1 |
| 1363 | maize   |       |       |       | 0      | 1 | 0 | 0 | 0 | 0 | 1 | 1 |
| 1363 | soybean |       |       |       |        | 1 | 0 | 0 | 0 | 0 | 1 | 1 |
| 1363 | soybean |       |       |       |        | 1 | 0 | 0 | 0 | 0 | 1 | 1 |
| 1363 | soybean |       |       |       |        | 1 | 0 | 0 | 0 | 0 | 1 | 1 |
| 1363 | maize   |       |       |       | 0      | 1 | 0 | 0 | 0 | 0 | 1 | 1 |
| 1363 | soybean |       |       |       | 0      | 1 | 0 | 0 | 0 | 0 | 1 | 1 |

|      |         |      |       |      |   |   |   |   |   |   |
|------|---------|------|-------|------|---|---|---|---|---|---|
| 1363 | soybean |      |       |      | 1 | 0 | 0 | 0 | 1 | 1 |
| 1363 | soybean |      |       |      | 1 | 0 | 0 | 0 | 1 | 1 |
| 1363 | soybean |      |       |      | 1 | 0 | 0 | 0 | 1 | 1 |
| 1382 | soybean |      |       | 6.8  | 0 | 0 | 0 | 1 | 0 | 0 |
| 1382 | soybean |      | -57.1 |      | 0 | 0 | 0 | 1 | 0 | 0 |
| 1382 | soybean |      |       | 4.5  | 0 | 0 | 0 | 1 | 0 | 0 |
| 1382 | soybean |      |       | -1.8 | 0 | 0 | 0 | 1 | 0 | 0 |
| 1382 | soybean |      |       |      | 0 | 0 | 0 | 1 | 0 | 0 |
| 1382 | soybean |      |       |      | 0 | 0 | 0 | 1 | 0 | 0 |
| 1382 | soybean |      |       |      | 0 | 0 | 0 | 1 | 0 | 0 |
| 1382 | soybean |      |       |      | 0 | 0 | 0 | 1 | 0 | 0 |
| 1382 | soybean |      |       | 5.4  | 0 | 0 | 0 | 1 | 0 | 0 |
| 1382 | soybean |      |       |      | 0 | 0 | 0 | 1 | 0 | 0 |
| 1382 | soybean |      | -55.9 |      | 0 | 0 | 0 | 1 | 0 | 0 |
| 1382 | soybean |      | 0.0   |      | 0 | 0 | 0 | 1 | 0 | 0 |
| 1382 | soybean |      |       |      | 0 | 0 | 0 | 1 | 0 | 0 |
| 1382 | soybean | 0.0  |       |      | 0 | 0 | 0 | 1 | 0 | 0 |
| 1382 | soybean |      |       |      | 0 | 0 | 0 | 1 | 0 | 0 |
| 1382 | soybean |      | 0.0   |      | 0 | 0 | 0 | 1 | 0 | 0 |
| 1382 | soybean |      | -53.1 |      | 0 | 0 | 0 | 1 | 0 | 0 |
| 1382 | soybean |      |       |      | 0 | 0 | 0 | 1 | 0 | 0 |
| 1382 | soybean |      |       | 4.2  | 0 | 0 | 0 | 1 | 0 | 0 |
| 1382 | soybean |      | -60.6 |      | 0 | 0 | 0 | 1 | 0 | 0 |
| 1382 | soybean | 0.0  |       |      | 0 | 0 | 0 | 1 | 0 | 0 |
| 1382 | soybean |      | -57.3 |      | 0 | 0 | 0 | 1 | 0 | 0 |
| 1382 | soybean |      | 0.0   |      | 0 | 0 | 0 | 1 | 0 | 0 |
| 1382 | soybean |      |       |      | 0 | 0 | 0 | 1 | 0 | 0 |
| 1382 | soybean |      | 0.0   |      | 0 | 0 | 0 | 1 | 0 | 0 |
| 1382 | soybean | 2.9  |       |      | 0 | 0 | 0 | 1 | 0 | 0 |
| 1382 | soybean |      |       |      | 0 | 0 | 0 | 1 | 0 | 0 |
| 1382 | soybean |      |       | 6.3  | 0 | 0 | 0 | 1 | 0 | 0 |
| 1382 | soybean | 4.2  |       |      | 0 | 0 | 0 | 1 | 0 | 0 |
| 1382 | soybean |      | 0.0   |      | 0 | 0 | 0 | 1 | 0 | 0 |
| 1382 | soybean | 0.0  |       |      | 0 | 0 | 0 | 1 | 0 | 0 |
| 1382 | soybean | 0.0  |       |      | 0 | 0 | 0 | 1 | 0 | 0 |
| 1382 | soybean | 0.0  |       |      | 0 | 0 | 0 | 1 | 0 | 0 |
| 1382 | soybean | 0.0  |       |      | 0 | 0 | 0 | 1 | 0 | 0 |
| 1382 | soybean |      | -57.5 |      | 0 | 0 | 0 | 1 | 0 | 0 |
| 1382 | soybean |      | 0.0   |      | 0 | 0 | 0 | 1 | 0 | 0 |
| 1382 | soybean |      |       |      | 0 | 0 | 0 | 1 | 0 | 0 |
| 1382 | soybean |      |       |      | 0 | 0 | 0 | 1 | 0 | 0 |
| 1458 | cotton  |      |       |      | 0 | 1 | 0 | 0 | 1 | 1 |
| 1458 | cotton  |      |       |      | 1 | 1 | 0 | 0 | 1 | 1 |
| 1550 | cotton  |      | -82.2 |      | 1 | 0 | 0 | 1 | 0 | 1 |
| 1550 | cotton  |      | -80.6 |      | 1 | 0 | 0 | 1 | 0 | 1 |
| 1550 | cotton  |      |       |      | 1 | 0 | 0 | 1 | 0 | 1 |
| 1550 | cotton  | 5.8  |       |      | 1 | 0 | 0 | 1 | 0 | 1 |
| 1550 | cotton  |      |       |      | 1 | 0 | 0 | 1 | 0 | 1 |
| 1550 | cotton  |      | -58.2 |      | 1 | 1 | 0 | 1 | 0 | 1 |
| 1550 | cotton  | 16.2 |       |      | 1 | 1 | 0 | 1 | 0 | 1 |
| 1550 | cotton  |      |       |      | 1 | 0 | 0 | 1 | 0 | 1 |
| 1550 | cotton  |      |       |      | 1 | 0 | 0 | 1 | 0 | 1 |
| 1559 | maize   |      |       |      | 1 | 1 | 1 | 0 | 0 | 0 |
| 1559 | maize   |      |       |      | 1 | 1 | 1 | 0 | 0 | 0 |
| 1559 | maize   |      |       |      | 1 | 1 | 1 | 0 | 0 | 0 |
| 1559 | maize   |      |       |      | 1 | 1 | 1 | 0 | 0 | 0 |
| 1559 | maize   |      |       |      | 1 | 1 | 1 | 0 | 0 | 0 |
| 1559 | maize   |      |       |      | 1 | 1 | 1 | 0 | 0 | 0 |
| 1559 | maize   |      |       |      | 1 | 1 | 1 | 0 | 0 | 0 |
| 1559 | maize   |      |       |      | 1 | 1 | 1 | 0 | 0 | 0 |
| 1559 | maize   |      |       |      | 1 | 1 | 1 | 0 | 0 | 0 |
| 1559 | maize   |      |       |      | 1 | 1 | 1 | 0 | 0 | 0 |
| 1559 | maize   |      |       |      | 1 | 1 | 1 | 0 | 0 | 0 |
| 1570 | cotton  |      |       |      | 1 | 0 | 0 | 1 | 0 | 0 |
| 1570 | cotton  |      |       |      | 1 | 0 | 0 | 1 | 0 | 0 |
| 1570 | cotton  | 5.8  |       |      | 1 | 0 | 0 | 1 | 0 | 0 |
| 1570 | cotton  |      | -58.2 |      | 1 | 1 | 0 | 1 | 0 | 0 |
| 1570 | cotton  |      | -80.6 |      | 1 | 0 | 0 | 1 | 0 | 0 |

|      |         |       |       |       |   |   |   |   |   |   |
|------|---------|-------|-------|-------|---|---|---|---|---|---|
| 1570 | cotton  |       |       | 1     | 0 | 0 | 1 | 0 | 0 | 0 |
| 1570 | cotton  |       |       |       | 1 | 0 | 1 | 0 | 0 | 0 |
| 1570 | cotton  |       | -82.2 | 1     | 0 | 0 | 1 | 0 | 0 | 0 |
| 1570 | cotton  | 15.0  |       | 1     | 1 | 0 | 1 | 0 | 0 | 0 |
| 1593 | cotton  |       |       | 1     | 0 | 0 | 1 | 0 | 1 | 1 |
| 1593 | cotton  | 2.5   |       | 1     | 0 | 0 | 1 | 0 | 1 | 1 |
| 1593 | cotton  |       | -21.6 | 1     | 0 | 0 | 1 | 0 | 1 | 1 |
| 1593 | cotton  | 4.3   |       | 1     | 0 | 0 | 1 | 0 | 1 | 1 |
| 1593 | cotton  |       | -80.3 | 1     | 0 | 0 | 1 | 0 | 1 | 1 |
| 1593 | cotton  |       |       | 1     | 0 | 0 | 1 | 0 | 1 | 1 |
| 1618 | soybean | 16.1  |       | 0     | 0 | 0 | 0 | 0 | 1 | 1 |
| 1618 | soybean |       | -33.9 | 0     | 0 | 0 | 0 | 0 | 1 | 1 |
| 1618 | soybean |       | -4.5  | 0     | 0 | 0 | 0 | 0 | 1 | 1 |
| 1618 | soybean | 3.0   |       | 0     | 0 | 0 | 0 | 0 | 1 | 1 |
| 1618 | soybean |       | -10.7 | 0     | 0 | 0 | 0 | 0 | 1 | 1 |
| 1618 | soybean |       | 8.8   | 0     | 0 | 0 | 0 | 0 | 1 | 1 |
| 1618 | soybean | 8.4   |       | 0     | 0 | 0 | 0 | 0 | 1 | 1 |
| 1618 | soybean |       | -33.9 | 0     | 0 | 0 | 0 | 0 | 1 | 1 |
| 1618 | soybean |       | -3.9  | 0     | 0 | 0 | 0 | 0 | 1 | 1 |
| 1618 | soybean |       | -0.9  | 0     | 0 | 0 | 0 | 0 | 1 | 1 |
| 1618 | soybean |       | -27.2 | 0     | 0 | 0 | 0 | 0 | 1 | 1 |
| 1618 | soybean |       | -30.9 | 0     | 0 | 0 | 0 | 0 | 1 | 1 |
| 1618 | soybean | -3.3  |       | 0     | 0 | 0 | 0 | 0 | 1 | 1 |
| 1618 | soybean |       | -44.8 | 0     | 0 | 0 | 0 | 0 | 1 | 1 |
| 1618 | soybean |       | -0.9  | 0     | 0 | 0 | 0 | 0 | 1 | 1 |
| 1618 | soybean | -1.8  |       | 0     | 0 | 0 | 0 | 0 | 1 | 1 |
| 1618 | soybean | 14.3  |       | 0     | 0 | 0 | 0 | 0 | 1 | 1 |
| 1618 | soybean |       | 11.9  | 0     | 0 | 0 | 0 | 0 | 1 | 1 |
| 1618 | soybean |       | 8.9   | 0     | 0 | 0 | 0 | 0 | 1 | 1 |
| 1618 | soybean |       | 11.0  | 0     | 0 | 0 | 0 | 0 | 1 | 1 |
| 1618 | soybean |       | -12.2 | 0     | 0 | 0 | 0 | 0 | 1 | 1 |
| 1631 | cotton  | -34.8 |       | 1     | 0 | 0 | 1 | 0 | 0 | 0 |
| 1631 | cotton  |       |       | 1     | 0 | 0 | 1 | 0 | 0 | 0 |
| 1631 | cotton  |       | -6.6  | 1     | 0 | 0 | 1 | 0 | 0 | 0 |
| 1631 | cotton  |       |       | 1     | 0 | 0 | 1 | 0 | 0 | 0 |
| 1631 | cotton  |       | 11.4  | 1     | 0 | 0 | 1 | 0 | 0 | 0 |
| 1631 | cotton  |       | -7.1  | 1     | 0 | 0 | 1 | 0 | 0 | 0 |
| 1639 | cotton  | 67.6  |       | 1     | 0 | 0 | 1 | 0 | 1 | 1 |
| 1639 | cotton  |       |       | 1     | 0 | 0 | 1 | 0 | 1 | 1 |
| 1639 | cotton  |       |       | 1     | 0 | 0 | 1 | 0 | 1 | 1 |
| 1639 | cotton  |       |       | 1     | 0 | 0 | 1 | 0 | 1 | 1 |
| 1639 | cotton  | 77.2  |       | 1     | 0 | 0 | 1 | 0 | 1 | 1 |
| 1639 | cotton  |       |       | 1     | 0 | 0 | 1 | 0 | 1 | 1 |
| 1639 | cotton  |       |       | 1     | 0 | 0 | 1 | 0 | 1 | 1 |
| 1639 | cotton  |       |       | 1     | 0 | 0 | 1 | 0 | 1 | 1 |
| 1689 | cotton  | 17.7  |       | 1     | 0 | 0 | 1 | 0 | 0 | 1 |
| 1689 | cotton  |       | -37.9 | 1     | 0 | 0 | 1 | 0 | 0 | 1 |
| 1689 | cotton  | 59.8  |       | 1     | 0 | 0 | 1 | 0 | 0 | 1 |
| 1689 | cotton  |       |       | 1     | 0 | 0 | 1 | 0 | 0 | 1 |
| 1689 | cotton  |       | -12.5 | 1     | 0 | 0 | 1 | 0 | 0 | 1 |
| 1689 | cotton  |       |       | 10.9  | 1 | 0 | 1 | 0 | 0 | 1 |
| 1697 | cotton  |       |       | 1     | 0 | 0 | 1 | 0 | 1 | 1 |
| 1697 | cotton  |       |       | 1     | 0 | 0 | 1 | 0 | 1 | 1 |
| 1697 | cotton  |       | -53.2 | 1     | 0 | 0 | 1 | 0 | 1 | 1 |
| 1697 | cotton  | 85.2  |       | 1     | 0 | 0 | 1 | 0 | 1 | 1 |
| 1697 | cotton  |       |       | 1     | 0 | 0 | 1 | 0 | 1 | 1 |
| 1697 | cotton  | 63.3  |       | 1     | 0 | 0 | 1 | 0 | 1 | 1 |
| 1697 | cotton  |       |       | 1     | 0 | 0 | 1 | 0 | 1 | 1 |
| 1697 | cotton  | 56.3  |       | 1     | 0 | 0 | 1 | 0 | 1 | 1 |
| 1697 | cotton  |       |       | 1     | 0 | 0 | 1 | 0 | 1 | 1 |
| 1697 | cotton  |       | -63.0 | 1     | 0 | 0 | 1 | 0 | 1 | 1 |
| 1697 | cotton  |       |       | 1     | 0 | 0 | 1 | 0 | 1 | 1 |
| 1697 | cotton  |       |       | 1     | 0 | 0 | 1 | 0 | 1 | 1 |
| 1697 | cotton  |       |       | 105.8 | 1 | 0 | 1 | 0 | 1 | 1 |
| 1697 | cotton  |       |       | 1     | 0 | 0 | 1 | 0 | 1 | 1 |
| 1697 | cotton  |       |       | 1     | 0 | 0 | 1 | 0 | 1 | 1 |
| 1697 | cotton  |       |       | 1     | 0 | 0 | 1 | 0 | 1 | 1 |
| 1697 | cotton  |       |       | 1     | 0 | 0 | 1 | 0 | 1 | 1 |

|      |        |      |       |       |   |   |   |   |   |   |
|------|--------|------|-------|-------|---|---|---|---|---|---|
| 1697 | cotton |      |       | 1     | 0 | 0 | 1 | 0 | 1 | 1 |
| 1697 | cotton |      | -52.9 | 1     | 0 | 0 | 1 | 0 | 1 | 1 |
| 1697 | cotton |      |       | 213.2 | 1 | 0 | 0 | 1 | 0 | 1 |
| 1697 | cotton |      |       | 1     | 0 | 0 | 1 | 0 | 1 | 1 |
| 1734 | cotton | 61.1 |       | 1     | 0 | 0 | 1 | 0 | 1 | 1 |
| 1734 | cotton |      |       |       | 1 | 0 | 1 | 0 | 1 | 1 |
| 1734 | cotton |      | -62.3 | 1     | 0 | 0 | 1 | 0 | 1 | 1 |
| 1778 | cotton |      |       | 1     | 1 | 0 | 1 | 0 | 1 | 1 |
| 1797 | cotton |      |       | 155.3 | 1 | 0 | 0 | 1 | 1 | 1 |
| 1797 | cotton | 2.3  |       | 1     | 0 | 0 | 1 | 1 | 1 | 1 |
| 1797 | cotton |      |       | 1     | 0 | 0 | 1 | 1 | 1 | 1 |
| 1797 | cotton |      |       | 1     | 0 | 0 | 1 | 1 | 1 | 1 |
| 1797 | cotton | 2.6  |       | 1     | 0 | 0 | 1 | 1 | 1 | 1 |
| 1797 | cotton |      |       | 1     | 0 | 0 | 1 | 1 | 1 | 1 |
| 1797 | cotton |      | -27.2 | 1     | 0 | 0 | 1 | 1 | 1 | 1 |
| 1797 | cotton |      | -22.8 | 1     | 0 | 0 | 1 | 1 | 1 | 1 |
| 1797 | cotton |      | -21.6 | 1     | 0 | 0 | 1 | 1 | 1 | 1 |
| 1797 | cotton | 0.5  |       | 1     | 0 | 0 | 1 | 1 | 1 | 1 |
| 1809 | cotton | 3.9  |       | 1     | 0 | 0 | 1 | 0 | 1 | 1 |
| 1809 | cotton |      |       | -1.3  | 1 | 0 | 0 | 1 | 0 | 1 |
| 1809 | cotton | 39.8 |       | 1     | 0 | 0 | 1 | 0 | 1 | 1 |
| 1809 | cotton |      |       | 1     | 0 | 0 | 1 | 0 | 1 | 1 |
| 1809 | cotton |      |       | 1     | 0 | 0 | 1 | 0 | 1 | 1 |
| 1809 | cotton |      |       | 1     | 0 | 0 | 1 | 0 | 1 | 1 |
| 1809 | cotton |      |       | 1     | 0 | 0 | 1 | 0 | 1 | 1 |
| 1809 | cotton |      |       | 1     | 0 | 0 | 1 | 0 | 1 | 1 |
| 1809 | cotton |      |       | 1     | 0 | 0 | 1 | 0 | 1 | 1 |
| 1809 | cotton |      |       | 57.7  | 1 | 0 | 0 | 1 | 0 | 1 |
| 1813 | cotton |      |       |       | 1 | 0 | 1 | 0 | 1 | 1 |
| 1813 | cotton |      |       |       | 1 | 0 | 1 | 0 | 1 | 1 |
| 1813 | cotton |      | -56.4 | 1     | 0 | 0 | 1 | 0 | 1 | 1 |
| 1813 | cotton |      |       |       | 1 | 0 | 1 | 0 | 1 | 1 |
| 1813 | cotton | 18.5 |       | 1     | 0 | 0 | 1 | 0 | 1 | 1 |
| 1813 | cotton |      |       |       | 1 | 0 | 1 | 0 | 1 | 1 |
| 1813 | cotton |      |       |       | 1 | 0 | 1 | 0 | 1 | 1 |
| 1813 | cotton | 13.8 |       | 1     | 0 | 0 | 1 | 0 | 1 | 1 |
| 1813 | cotton |      |       |       | 1 | 0 | 1 | 0 | 1 | 1 |
| 1813 | cotton |      | -59.2 | 1     | 0 | 0 | 1 | 0 | 1 | 1 |
| 1813 | cotton | 45.8 |       | 1     | 0 | 0 | 1 | 0 | 1 | 1 |
| 1813 | cotton |      |       |       | 1 | 0 | 1 | 0 | 1 | 1 |
| 1813 | cotton |      |       |       | 1 | 0 | 1 | 0 | 1 | 1 |
| 1813 | cotton |      |       |       | 1 | 0 | 1 | 0 | 1 | 1 |
| 1813 | cotton |      | -24.9 | 1     | 0 | 0 | 1 | 0 | 1 | 1 |
| 1815 | cotton |      |       | 1     | 0 | 0 | 1 | 0 | 1 | 1 |
| 1815 | cotton |      | -39.9 | 1     | 0 | 0 | 1 | 0 | 1 | 1 |
| 1815 | cotton |      |       | 19.6  | 1 | 0 | 0 | 1 | 0 | 1 |
| 1815 | cotton |      |       | 1     | 0 | 0 | 1 | 0 | 1 | 1 |
| 1815 | cotton |      |       | 1     | 0 | 0 | 1 | 0 | 1 | 1 |
| 1815 | cotton |      |       | 1     | 0 | 0 | 1 | 0 | 1 | 1 |
| 1815 | cotton |      |       | 1     | 0 | 0 | 1 | 0 | 1 | 1 |
| 1815 | cotton |      |       |       | 1 | 0 | 1 | 0 | 1 | 1 |
| 1815 | cotton |      | -83.0 | 1     | 0 | 0 | 1 | 0 | 1 | 1 |
| 1815 | cotton |      |       | 1     | 0 | 0 | 1 | 0 | 1 | 1 |
| 1815 | cotton |      |       | 452.6 | 1 | 0 | 0 | 1 | 0 | 1 |
| 1815 | cotton |      | -61.1 | 1     | 1 | 0 | 1 | 0 | 1 | 1 |
| 1815 | cotton |      |       | 1     | 0 | 0 | 1 | 0 | 1 | 1 |
| 1815 | cotton | 83.7 |       | 1     | 0 | 0 | 1 | 0 | 1 | 1 |
| 1842 | cotton |      |       | 1     | 0 | 0 | 1 | 0 | 0 | 0 |
| 1842 | cotton |      |       | 17.3  | 1 | 0 | 0 | 1 | 0 | 0 |
| 1842 | cotton |      | -12.3 | 1     | 0 | 0 | 1 | 0 | 0 | 0 |
| 1842 | cotton |      |       | 1     | 0 | 0 | 1 | 0 | 0 | 0 |
| 1842 | cotton |      |       | 1     | 0 | 0 | 1 | 0 | 0 | 0 |
| 1842 | cotton | 3.4  |       | 1     | 0 | 0 | 1 | 0 | 0 | 0 |
| 1842 | cotton |      |       | 8.1   | 1 | 0 | 0 | 1 | 0 | 0 |
| 1842 | cotton | 5.4  |       | 1     | 0 | 0 | 1 | 0 | 0 | 0 |
| 1842 | cotton |      |       | -8.9  | 1 | 0 | 0 | 1 | 0 | 0 |
| 1842 | cotton |      |       | 1     | 0 | 0 | 1 | 0 | 0 | 0 |
| 1864 | cotton | 9.8  |       | 1     | 0 | 0 | 0 | 0 | 0 | 1 |











|      |         |      |  |       |      |      |   |   |   |   |   |
|------|---------|------|--|-------|------|------|---|---|---|---|---|
| 2068 | cotton  | 2.3  |  |       | 1    | 0    | 0 | 1 | 0 | 0 | 0 |
| 2068 | cotton  |      |  |       | 1    | 0    | 0 | 1 | 0 | 0 | 0 |
| 2068 | cotton  |      |  |       | 1    | 0    | 0 | 1 | 0 | 0 | 0 |
| 2075 | cotton  |      |  |       | 95.0 | 1    | 0 | 0 | 1 | 0 | 1 |
| 2075 | cotton  |      |  |       | 94.6 | 1    | 0 | 0 | 1 | 0 | 1 |
| 2075 | cotton  |      |  | 34.7  |      | 1    | 0 | 0 | 1 | 0 | 1 |
| 2075 | cotton  | 48.1 |  |       |      | 1    | 0 | 0 | 1 | 0 | 1 |
| 2075 | cotton  |      |  |       |      | 1    | 0 | 0 | 1 | 0 | 1 |
| 2075 | cotton  |      |  | 4.7   |      | 1    | 0 | 0 | 1 | 0 | 1 |
| 2075 | cotton  | 65.2 |  |       |      | 1    | 0 | 0 | 1 | 0 | 1 |
| 2075 | cotton  |      |  |       |      | 1    | 0 | 0 | 1 | 0 | 1 |
| 2101 | cotton  |      |  |       |      | 1    | 0 | 0 | 1 | 0 | 1 |
| 2101 | cotton  |      |  | -42.4 |      | 1    | 0 | 0 | 1 | 0 | 1 |
| 2101 | cotton  |      |  |       |      | 1    | 0 | 0 | 1 | 0 | 1 |
| 2101 | cotton  | 3.1  |  |       |      | 1    | 0 | 0 | 1 | 0 | 1 |
| 2101 | cotton  |      |  |       |      | 1    | 0 | 0 | 1 | 0 | 1 |
| 2101 | cotton  |      |  |       |      | 1    | 0 | 0 | 1 | 0 | 1 |
| 2101 | cotton  |      |  | -68.5 |      | 1    | 0 | 0 | 1 | 0 | 1 |
| 2101 | cotton  |      |  |       |      | 1    | 0 | 0 | 1 | 0 | 1 |
| 2101 | cotton  | 15.4 |  | -62.1 |      | 1    | 0 | 0 | 1 | 0 | 1 |
| 2101 | cotton  |      |  |       |      | 1    | 1 | 0 | 1 | 0 | 1 |
| 2101 | cotton  |      |  |       |      | 1    | 0 | 0 | 1 | 0 | 1 |
| 2101 | cotton  | 10.2 |  |       |      | 1    | 0 | 0 | 1 | 0 | 1 |
| 2101 | cotton  |      |  |       |      | 1    | 0 | 0 | 1 | 0 | 1 |
| 2101 | cotton  |      |  | -45.4 |      | 1    | 0 | 0 | 1 | 0 | 1 |
| 2101 | cotton  |      |  |       |      | 1    | 1 | 0 | 1 | 0 | 1 |
| 2101 | cotton  |      |  |       |      | 1    | 0 | 0 | 1 | 0 | 1 |
| 2101 | cotton  |      |  | -54.9 |      | 1    | 0 | 0 | 1 | 0 | 1 |
| 2101 | cotton  |      |  |       |      | 1    | 0 | 0 | 1 | 0 | 1 |
| 2101 | cotton  |      |  | -61.1 |      | 1    | 0 | 0 | 1 | 0 | 1 |
| 2101 | cotton  | 26.4 |  |       |      | 1    | 0 | 0 | 1 | 0 | 1 |
| 2101 | cotton  |      |  |       |      | 1    | 0 | 0 | 1 | 0 | 1 |
| 2101 | cotton  |      |  |       |      | 1    | 0 | 0 | 1 | 0 | 1 |
| 2101 | cotton  |      |  | 0.3   |      | 1    | 0 | 0 | 1 | 0 | 1 |
| 2101 | cotton  |      |  |       |      | 1    | 0 | 0 | 1 | 0 | 1 |
| 2101 | cotton  |      |  | -2.4  |      | 1    | 0 | 0 | 1 | 0 | 1 |
| 2101 | cotton  |      |  |       |      | 1    | 0 | 0 | 1 | 0 | 1 |
| 2101 | cotton  |      |  |       |      | 1    | 0 | 0 | 1 | 0 | 1 |
| 2101 | cotton  |      |  |       |      | 1    | 0 | 0 | 1 | 0 | 1 |
| 2101 | cotton  |      |  | -1.0  |      | 1    | 0 | 0 | 1 | 0 | 1 |
| 2101 | cotton  |      |  |       |      | 1    | 0 | 0 | 1 | 0 | 1 |
| 2101 | cotton  |      |  |       |      | 1    | 0 | 0 | 1 | 0 | 1 |
| 2101 | cotton  |      |  | -49.9 |      | 1    | 0 | 0 | 1 | 0 | 1 |
| 2101 | cotton  |      |  |       |      | 1    | 0 | 0 | 1 | 0 | 1 |
| 2101 | cotton  |      |  |       |      | 1    | 0 | 0 | 1 | 0 | 1 |
| 2111 | cotton  |      |  |       |      | 0    | 0 | 0 | 0 | 0 | 0 |
| 2111 | soybean |      |  |       |      | 0    | 0 | 0 | 0 | 0 | 0 |
| 2111 | soybean |      |  |       |      | 0    | 1 | 0 | 0 | 0 | 0 |
| 2111 | maize   |      |  |       |      | 0    | 0 | 0 | 0 | 0 | 0 |
| 2136 | cotton  |      |  |       |      |      | 1 | 0 | 1 | 0 | 1 |
| 2136 | cotton  |      |  |       |      |      | 1 | 0 | 1 | 0 | 1 |
| 2136 | cotton  |      |  |       |      |      | 1 | 0 | 1 | 0 | 1 |
| 2136 | cotton  |      |  |       |      |      | 1 | 0 | 1 | 0 | 1 |
| 2147 | cotton  | 46.2 |  |       |      |      | 1 | 0 | 0 | 1 | 0 |
| 2147 | cotton  |      |  |       |      |      | 1 | 0 | 0 | 1 | 0 |
| 2147 | cotton  |      |  | -33.3 |      |      | 1 | 0 | 0 | 1 | 0 |
| 2147 | cotton  |      |  |       |      |      | 1 | 0 | 0 | 1 | 0 |
| 2181 | cotton  |      |  |       |      | 86.9 | 1 | 0 | 0 | 1 | 0 |
| 2181 | cotton  |      |  |       |      |      | 1 | 0 | 0 | 1 | 0 |
| 2181 | cotton  |      |  | -1.0  |      |      | 1 | 0 | 0 | 1 | 0 |
| 2181 | cotton  |      |  |       |      |      | 1 | 0 | 0 | 1 | 0 |
| 2181 | cotton  | 53.6 |  |       |      |      | 1 | 0 | 0 | 1 | 0 |
| 2181 | cotton  |      |  |       |      |      | 1 | 0 | 0 | 1 | 0 |
| 2181 | cotton  |      |  |       |      |      | 1 | 0 | 0 | 1 | 0 |
| 2181 | cotton  |      |  | -2.2  |      |      | 1 | 0 | 0 | 1 | 0 |
| 2181 | cotton  | 54.3 |  |       |      |      | 1 | 0 | 0 | 1 | 0 |
| 2181 | cotton  |      |  |       |      | 90.0 | 1 | 0 | 0 | 1 | 0 |
| 2187 | cotton  |      |  |       |      |      | 1 | 0 | 0 | 0 | 0 |
| 2187 | cotton  |      |  |       |      |      | 1 | 0 | 0 | 0 | 0 |
| 2187 | cotton  |      |  |       |      |      | 1 | 0 | 0 | 0 | 0 |
| 2194 | cotton  |      |  |       |      |      | 1 | 0 | 0 | 0 | 0 |
| 2194 | cotton  |      |  |       |      |      | 1 | 0 | 0 | 0 | 0 |
| 2194 | cotton  |      |  |       |      |      | 1 | 0 | 0 | 0 | 0 |
| 2194 | cotton  |      |  |       |      |      | 1 | 0 | 0 | 0 | 0 |
| 2196 | maize   |      |  |       |      |      | 1 | 0 | 0 | 0 | 0 |



|      |         |       |       |       |       |   |   |   |   |   |   |   |
|------|---------|-------|-------|-------|-------|---|---|---|---|---|---|---|
| 2199 | cotton  | 22.3  |       |       | 1     | 0 | 0 | 1 | 0 | 1 | 1 |   |
| 2210 | cotton  |       |       | -4.7  | 1     | 0 | 0 | 1 | 0 | 0 | 0 |   |
| 2210 | cotton  |       | -80.0 |       | 1     | 0 | 0 | 1 | 0 | 0 | 0 |   |
| 2210 | cotton  | -45.4 |       |       | 1     | 0 | 0 | 1 | 0 | 0 | 0 |   |
| 2210 | cotton  |       | -45.4 |       | 1     | 0 | 0 | 1 | 0 | 0 | 0 |   |
| 2210 | cotton  |       | -43.1 |       | 1     | 0 | 0 | 1 | 0 | 0 | 0 |   |
| 2210 | cotton  |       |       | -90.4 | 1     | 0 | 0 | 1 | 0 | 0 | 0 |   |
| 2210 | cotton  |       |       | -12.9 | 1     | 0 | 0 | 1 | 0 | 0 | 0 |   |
| 2210 | cotton  | -43.1 |       |       | 1     | 0 | 0 | 1 | 0 | 0 | 0 |   |
| 2219 | cotton  |       | -59.5 |       | 1     | 0 | 0 | 1 | 0 | 1 | 1 |   |
| 2219 | cotton  |       | -51.1 |       | 1     | 0 | 0 | 1 | 0 | 1 | 1 |   |
| 2219 | cotton  |       | -46.0 |       | 1     | 0 | 0 | 1 | 0 | 1 | 1 |   |
| 2219 | cotton  | 32.0  |       |       | 1     | 0 | 0 | 1 | 0 | 1 | 1 |   |
| 2219 | cotton  | 34.2  |       |       | 1     | 0 | 0 | 1 | 0 | 1 | 1 |   |
| 2219 | cotton  |       | -50.4 |       | 1     | 0 | 0 | 1 | 0 | 1 | 1 |   |
| 2219 | cotton  | 35.0  |       |       | 1     | 0 | 0 | 1 | 0 | 1 | 1 |   |
| 2219 | cotton  | 39.1  |       |       | 1     | 0 | 0 | 1 | 0 | 1 | 1 |   |
| 2232 | cotton  |       | -67.1 |       | 1     | 0 | 0 | 1 | 0 | 1 | 1 |   |
| 2232 | cotton  | 22.0  |       |       | 1     | 0 | 0 | 1 | 0 | 1 | 1 |   |
| 2232 | cotton  |       |       |       |       | 1 | 0 | 1 | 0 | 1 | 1 |   |
| 2278 | cotton  |       |       |       | 128.7 | 1 | 0 | 0 | 1 | 0 | 0 | 1 |
| 2278 | cotton  |       |       |       | 69.0  | 1 | 0 | 0 | 1 | 0 | 0 | 1 |
| 2278 | cotton  |       | -21.3 |       | 1     | 0 | 0 | 1 | 0 | 0 | 1 |   |
| 2278 | cotton  | 35.0  |       |       | 1     | 0 | 0 | 1 | 0 | 0 | 1 |   |
| 2278 | cotton  | 34.2  |       |       | 1     | 0 | 0 | 1 | 0 | 0 | 1 |   |
| 2278 | cotton  |       | -51.1 |       | 1     | 0 | 0 | 1 | 0 | 0 | 1 |   |
| 2278 | cotton  | 42.7  |       |       | 1     | 0 | 0 | 1 | 0 | 0 | 1 |   |
| 2278 | cotton  |       | -50.4 |       | 1     | 0 | 0 | 1 | 0 | 0 | 1 |   |
| 2278 | cotton  |       |       |       | 70.3  | 1 | 0 | 0 | 1 | 0 | 0 | 1 |
| 2326 | maize   | 36.4  |       |       | 1     | 1 | 0 | 0 | 0 | 0 | 1 |   |
| 2326 | maize   | 44.5  |       |       | 1     | 1 | 0 | 0 | 0 | 0 | 1 |   |
| 2332 | cotton  | 43.7  |       |       | 1     | 0 | 0 | 1 | 1 | 1 | 1 |   |
| 2332 | cotton  | 45.4  |       |       | 1     | 0 | 0 | 1 | 1 | 1 | 1 |   |
| 2347 | cotton  |       |       |       | 151.2 | 1 | 0 | 0 | 1 | 0 | 1 | 1 |
| 2347 | cotton  |       |       |       |       | 1 | 0 | 0 | 1 | 0 | 1 | 1 |
| 2347 | cotton  |       |       |       |       | 1 | 0 | 0 | 1 | 0 | 1 | 1 |
| 2347 | cotton  |       |       |       |       | 1 | 0 | 0 | 1 | 0 | 1 | 1 |
| 2347 | cotton  |       |       | -30.8 | 1     | 0 | 0 | 1 | 0 | 1 | 1 |   |
| 2347 | cotton  |       |       |       | 1     | 0 | 0 | 1 | 0 | 1 | 1 |   |
| 2347 | cotton  |       |       |       | 1     | 0 | 0 | 1 | 0 | 1 | 1 |   |
| 2347 | cotton  | 30.4  |       |       | 1     | 0 | 0 | 1 | 0 | 1 | 1 |   |
| 2347 | cotton  |       |       | -8.9  | 1     | 0 | 0 | 1 | 0 | 1 | 1 |   |
| 2347 | cotton  |       |       |       | 1     | 0 | 0 | 1 | 0 | 1 | 1 |   |
| 2361 | cotton  |       | -68.1 |       | 1     | 0 | 0 | 1 | 0 | 1 | 1 |   |
| 2361 | cotton  |       | -31.4 |       | 1     | 1 | 0 | 1 | 0 | 1 | 1 |   |
| 2361 | cotton  |       |       | -48.0 | 1     | 0 | 0 | 1 | 0 | 1 | 1 |   |
| 2361 | cotton  |       | -31.5 |       | 1     | 0 | 0 | 1 | 0 | 1 | 1 |   |
| 2361 | cotton  |       |       |       | 1     | 0 | 0 | 1 | 0 | 1 | 1 |   |
| 2361 | cotton  |       | -22.8 |       | 1     | 0 | 0 | 1 | 0 | 1 | 1 |   |
| 2361 | cotton  |       |       |       | 1     | 1 | 0 | 1 | 0 | 1 | 1 |   |
| 2361 | cotton  |       | -32.7 |       | 1     | 0 | 0 | 1 | 0 | 1 | 1 |   |
| 2361 | cotton  |       | -54.7 |       | 1     | 0 | 0 | 1 | 0 | 1 | 1 |   |
| 2361 | cotton  |       |       |       | 1     | 0 | 0 | 1 | 0 | 1 | 1 |   |
| 2361 | cotton  |       |       |       | 1     | 1 | 0 | 1 | 0 | 1 | 1 |   |
| 2361 | cotton  |       |       |       | 1     | 0 | 0 | 1 | 0 | 1 | 1 |   |
| 2361 | cotton  |       |       |       | 1     | 1 | 0 | 1 | 0 | 1 | 1 |   |
| 2362 | maize   |       |       |       |       | 1 | 1 | 0 | 0 | 0 | 0 |   |
| 2362 | cotton  |       |       |       |       | 1 | 1 | 0 | 0 | 0 | 0 |   |
| 2362 | soybean |       |       |       |       | 1 | 1 | 0 | 0 | 0 | 0 |   |
| 2372 | cotton  | 60.5  |       |       | 1     | 0 | 0 | 1 | 0 | 1 | 1 |   |
| 2372 | cotton  | 18.3  |       |       | 1     | 0 | 0 | 1 | 0 | 1 | 1 |   |
| 2372 | cotton  | 55.0  |       |       | 1     | 0 | 0 | 1 | 0 | 1 | 1 |   |
| 2372 | cotton  |       | -46.6 |       | 1     | 0 | 0 | 1 | 0 | 1 | 1 |   |
| 2372 | cotton  | 33.3  |       |       | 1     | 0 | 0 | 1 | 0 | 1 | 1 |   |
| 2372 | cotton  |       | -54.8 |       | 1     | 0 | 0 | 1 | 0 | 1 | 1 |   |
| 2372 | cotton  |       | -48.6 |       | 1     | 0 | 0 | 1 | 0 | 1 | 1 |   |

|      |         |      |       |       |      |   |   |   |   |   |   |   |
|------|---------|------|-------|-------|------|---|---|---|---|---|---|---|
| 2372 | cotton  | -9.7 |       |       |      | 1 | 0 | 0 | 1 | 0 | 1 | 1 |
| 2372 | cotton  |      | -42.0 |       |      | 1 | 0 | 0 | 1 | 0 | 1 | 1 |
| 2372 | cotton  |      | -57.1 |       |      | 1 | 0 | 0 | 1 | 0 | 1 | 1 |
| 2383 | maize   |      |       |       |      | 1 | 1 | 0 | 1 | 1 | 1 | 1 |
| 2383 | maize   | 27.5 |       |       |      | 1 | 0 | 0 | 1 | 1 | 1 | 1 |
| 2383 | maize   | 61.1 |       |       |      | 1 | 0 | 0 | 1 | 1 | 1 | 1 |
| 2383 | maize   |      |       |       |      | 1 | 0 | 0 | 1 | 1 | 1 | 1 |
| 2383 | maize   | 29.9 |       |       |      | 1 | 0 | 0 | 1 | 1 | 1 | 1 |
| 2383 | maize   |      |       |       |      | 1 | 0 | 0 | 1 | 1 | 1 | 1 |
| 2383 | maize   | 29.7 |       |       |      | 1 | 0 | 0 | 1 | 1 | 1 | 1 |
| 2383 | maize   | 55.1 |       |       |      | 1 | 0 | 0 | 1 | 1 | 1 | 1 |
| 2383 | maize   | 40.3 |       |       |      | 1 | 0 | 0 | 1 | 1 | 1 | 1 |
| 2383 | maize   |      |       |       | 13.6 | 1 | 0 | 0 | 1 | 1 | 1 | 1 |
| 2384 | cotton  |      |       |       |      | 1 | 0 | 0 | 1 | 0 | 1 | 1 |
| 2384 | cotton  |      |       |       |      | 1 | 0 | 0 | 1 | 0 | 1 | 1 |
| 2384 | cotton  |      |       |       |      | 1 | 0 | 0 | 1 | 0 | 1 | 1 |
| 2384 | cotton  |      |       |       |      | 1 | 0 | 0 | 1 | 0 | 1 | 1 |
| 2389 | maize   | 16.4 |       |       |      | 0 | 0 | 0 | 0 | 0 | 1 | 1 |
| 2389 | maize   | 20.7 |       |       |      | 1 | 0 | 0 | 0 | 0 | 1 | 1 |
| 2399 | maize   | 33.1 |       |       |      | 1 | 1 | 0 | 0 | 0 | 0 | 1 |
| 2399 | maize   | 12.4 |       |       |      | 1 | 0 | 0 | 0 | 0 | 0 | 1 |
| 2399 | maize   |      | -44.4 |       |      | 1 | 0 | 0 | 0 | 0 | 0 | 1 |
| 2409 | cotton  | 5.1  |       |       |      | 1 | 0 | 0 | 1 | 1 | 1 | 1 |
| 2409 | cotton  | 3.8  |       |       |      | 1 | 0 | 0 | 1 | 1 | 1 | 1 |
| 2410 | cotton  |      |       |       |      | 1 | 1 | 0 | 1 | 0 | 1 | 1 |
| 2410 | cotton  |      |       |       |      | 1 | 1 | 0 | 1 | 0 | 1 | 1 |
| 2410 | cotton  |      |       |       |      | 1 | 1 | 0 | 1 | 0 | 1 | 1 |
| 2410 | cotton  |      |       |       |      | 1 | 1 | 0 | 1 | 0 | 1 | 1 |
| 2414 | soybean | 12.5 |       |       |      | 0 | 1 | 1 | 0 | 0 | 0 | 0 |
| 2414 | soybean | 30.2 |       |       |      | 0 | 1 | 1 | 0 | 0 | 0 | 0 |
| 2414 | soybean | 7.0  |       |       |      | 0 | 1 | 1 | 0 | 0 | 0 | 0 |
| 2433 | maize   | 25.5 |       |       |      | 1 | 1 | 0 | 1 | 0 | 1 | 1 |
| 2433 | maize   |      |       |       |      | 1 | 1 | 0 | 1 | 0 | 1 | 1 |
| 2433 | maize   |      | -74.5 |       |      | 1 | 1 | 0 | 1 | 0 | 1 | 1 |
| 2433 | maize   |      |       |       |      | 1 | 1 | 0 | 1 | 0 | 1 | 1 |
| 2433 | maize   |      |       |       |      | 1 | 1 | 0 | 1 | 0 | 1 | 1 |
| 2433 | maize   |      |       |       |      | 1 | 1 | 0 | 1 | 0 | 1 | 1 |
| 2433 | maize   |      | 33.0  |       |      | 1 | 1 | 0 | 1 | 0 | 1 | 1 |
| 2433 | maize   | 14.7 |       |       |      | 1 | 1 | 0 | 1 | 0 | 1 | 1 |
| 2433 | maize   |      |       |       | 53.8 | 1 | 1 | 0 | 1 | 0 | 1 | 1 |
| 2433 | maize   |      | -65.3 |       |      | 1 | 1 | 0 | 1 | 0 | 1 | 1 |
| 2433 | maize   |      | 73.8  |       |      | 1 | 1 | 0 | 1 | 0 | 1 | 1 |
| 2433 | maize   |      |       |       | 78.3 | 1 | 1 | 0 | 1 | 0 | 1 | 1 |
| 2435 | cotton  |      |       |       |      | 1 | 0 | 0 | 1 | 0 | 0 | 0 |
| 2435 | cotton  | 28.1 |       |       |      | 1 | 0 | 0 | 1 | 0 | 0 | 0 |
| 2435 | cotton  |      |       |       |      | 1 | 0 | 0 | 1 | 0 | 0 | 0 |
| 2435 | cotton  |      | -21.2 |       |      | 1 | 0 | 0 | 1 | 0 | 0 | 0 |
| 2435 | cotton  |      |       |       |      | 1 | 0 | 0 | 1 | 0 | 0 | 0 |
| 2435 | cotton  |      |       |       | 35.0 | 1 | 0 | 0 | 1 | 0 | 0 | 0 |
| 2435 | cotton  |      |       | -15.6 |      | 1 | 0 | 0 | 1 | 0 | 0 | 0 |
| 2435 | cotton  |      |       | 10.7  |      | 1 | 0 | 0 | 1 | 0 | 0 | 0 |
| 2435 | cotton  |      |       |       |      | 1 | 0 | 0 | 1 | 0 | 0 | 0 |
| 2443 | cotton  |      |       |       |      | 1 | 0 | 0 | 1 | 0 | 1 | 1 |
| 2443 | cotton  | 4.2  |       |       |      | 1 | 0 | 0 | 1 | 0 | 1 | 1 |
| 2443 | cotton  |      |       |       |      | 1 | 0 | 0 | 1 | 0 | 1 | 1 |
| 2443 | cotton  |      |       |       |      | 1 | 0 | 0 | 1 | 0 | 1 | 1 |
| 2443 | cotton  |      |       |       |      | 1 | 0 | 0 | 1 | 0 | 1 | 1 |
| 2443 | cotton  |      |       |       |      | 1 | 0 | 0 | 1 | 0 | 1 | 1 |
| 2454 | cotton  |      |       |       |      | 1 | 0 | 0 | 1 | 0 | 0 | 0 |
| 2454 | cotton  |      |       |       |      | 1 | 0 | 0 | 1 | 0 | 0 | 0 |
| 2454 | cotton  |      | -58.2 |       |      | 1 | 0 | 0 | 1 | 0 | 0 | 0 |
| 2454 | cotton  |      |       |       |      | 1 | 0 | 0 | 1 | 0 | 0 | 0 |
| 2476 | cotton  | 12.4 |       |       |      | 1 | 1 | 0 | 1 | 0 | 0 | 0 |
| 2476 | cotton  |      |       |       |      | 1 | 1 | 0 | 1 | 0 | 0 | 0 |
| 2476 | cotton  | 14.2 |       |       |      | 1 | 1 | 0 | 1 | 0 | 0 | 0 |
| 2476 | cotton  |      |       |       |      | 1 | 1 | 0 | 1 | 0 | 0 | 0 |
| 2476 | cotton  |      |       |       |      | 1 | 1 | 0 | 1 | 0 | 0 | 0 |

|      |        |      |       |       |   |   |   |   |   |   |   |
|------|--------|------|-------|-------|---|---|---|---|---|---|---|
| 2476 | cotton | 19.0 |       |       | 1 | 1 | 0 | 1 | 0 | 0 | 0 |
| 2487 | cotton | 19.3 |       |       | 1 | 0 | 0 | 1 | 1 | 1 | 1 |
| 2487 | cotton | 48.5 |       |       | 1 | 0 | 0 | 1 | 1 | 1 | 1 |
| 2488 | maize  |      |       |       | 1 | 0 | 0 | 1 | 0 | 1 | 1 |
| 2488 | maize  |      | -28.7 |       | 1 | 0 | 0 | 1 | 0 | 1 | 1 |
| 2488 | maize  |      |       |       | 1 | 0 | 0 | 1 | 0 | 1 | 1 |
| 2488 | maize  |      |       |       | 1 | 0 | 0 | 1 | 0 | 1 | 1 |
| 2488 | maize  | 34.3 |       |       | 1 | 0 | 0 | 1 | 0 | 1 | 1 |
| 2488 | maize  |      |       |       | 1 | 0 | 0 | 1 | 0 | 1 | 1 |
| 2488 | maize  |      |       | 88.8  | 1 | 0 | 0 | 1 | 0 | 1 | 1 |
| 2488 | maize  |      |       |       | 1 | 0 | 0 | 1 | 0 | 1 | 1 |
| 2488 | maize  |      |       |       | 1 | 0 | 0 | 1 | 0 | 1 | 1 |
| 2488 | maize  |      |       |       | 1 | 0 | 0 | 1 | 0 | 1 | 1 |
| 2488 | maize  |      |       |       | 1 | 0 | 0 | 1 | 0 | 1 | 1 |
| 2502 | cotton |      |       | 4.6   | 1 | 0 | 0 | 1 | 0 | 1 | 1 |
| 2502 | cotton | 6.8  |       |       | 1 | 0 | 0 | 1 | 0 | 1 | 1 |
| 2502 | cotton | -1.7 |       |       | 1 | 0 | 0 | 1 | 0 | 1 | 1 |
| 2502 | cotton |      |       | -3.1  | 1 | 0 | 0 | 1 | 0 | 1 | 1 |
| 2502 | cotton | 5.0  |       |       | 1 | 0 | 0 | 1 | 0 | 1 | 1 |
| 2502 | cotton |      |       | 11.0  | 1 | 0 | 0 | 1 | 0 | 1 | 1 |
| 2502 | cotton | 4.8  |       |       | 1 | 0 | 0 | 1 | 0 | 1 | 1 |
| 2521 | cotton |      |       |       | 1 | 0 | 0 | 1 | 1 | 0 | 0 |
| 2523 | maize  | 0.1  |       |       | 1 | 0 | 0 | 0 | 0 | 1 | 1 |
| 2523 | maize  | 0.3  |       |       | 0 | 0 | 0 | 0 | 0 | 1 | 1 |
| 2529 | cotton |      | 4.2   |       | 1 | 0 | 0 | 1 | 0 | 1 | 1 |
| 2529 | cotton |      |       |       | 1 | 0 | 0 | 1 | 0 | 1 | 1 |
| 2529 | cotton |      |       |       | 1 | 1 | 0 | 1 | 0 | 1 | 1 |
| 2529 | cotton |      |       | 102.0 | 1 | 0 | 0 | 1 | 0 | 1 | 1 |
| 2529 | cotton |      | -37.0 |       | 1 | 0 | 0 | 1 | 0 | 1 | 1 |
| 2529 | cotton | 35.3 |       |       | 1 | 0 | 0 | 1 | 0 | 1 | 1 |
| 2529 | cotton |      |       | 93.2  | 1 | 0 | 0 | 1 | 0 | 1 | 1 |
| 2529 | cotton | 36.7 |       |       | 1 | 0 | 0 | 1 | 0 | 1 | 1 |
| 2529 | cotton |      |       |       | 1 | 0 | 0 | 1 | 0 | 1 | 1 |
| 2529 | cotton |      |       |       | 1 | 1 | 0 | 1 | 0 | 1 | 1 |
| 2551 | cotton |      |       |       | 1 | 0 | 0 | 1 | 0 | 1 | 1 |
| 2551 | cotton |      |       |       | 1 | 0 | 0 | 1 | 0 | 1 | 1 |
| 2551 | cotton |      |       |       | 1 | 0 | 0 | 1 | 0 | 1 | 1 |
| 2551 | cotton |      |       |       | 1 | 0 | 0 | 1 | 0 | 1 | 1 |
| 2551 | cotton |      |       | 8.2   | 1 | 0 | 0 | 1 | 0 | 1 | 1 |
| 2551 | cotton |      |       |       | 1 | 0 | 0 | 1 | 0 | 1 | 1 |
| 2551 | cotton |      |       |       | 1 | 0 | 0 | 1 | 0 | 1 | 1 |
| 2551 | cotton |      |       |       | 1 | 0 | 0 | 1 | 0 | 1 | 1 |
| 2551 | cotton |      |       |       | 1 | 0 | 0 | 1 | 0 | 1 | 1 |
| 2551 | cotton |      | -33.3 |       | 1 | 0 | 0 | 1 | 0 | 1 | 1 |
| 2555 | maize  | 34.7 |       |       | 1 | 0 | 0 | 1 | 0 | 0 | 1 |
| 2555 | maize  |      | -80.0 |       | 1 | 0 | 0 | 1 | 0 | 0 | 1 |
| 2555 | maize  |      |       |       | 1 | 0 | 0 | 1 | 0 | 0 | 1 |
| 2555 | maize  |      |       |       | 1 | 0 | 0 | 1 | 0 | 0 | 1 |
| 2555 | maize  |      | -66.2 |       | 1 | 0 | 0 | 1 | 0 | 0 | 1 |
| 2555 | maize  | 25.5 |       |       | 1 | 0 | 0 | 1 | 0 | 0 | 1 |
| 2555 | maize  |      |       |       | 1 | 0 | 0 | 1 | 0 | 0 | 1 |
| 2555 | maize  |      |       |       | 1 | 0 | 0 | 1 | 0 | 0 | 1 |
| 2555 | maize  |      |       |       | 1 | 1 | 0 | 1 | 0 | 0 | 1 |
| 2555 | maize  |      |       |       | 1 | 0 | 0 | 1 | 0 | 0 | 1 |
| 2555 | maize  |      |       |       | 1 | 0 | 0 | 1 | 0 | 0 | 1 |
| 2555 | maize  | 12.6 |       |       | 1 | 0 | 0 | 1 | 0 | 0 | 1 |
| 2555 | maize  | 20.4 |       |       | 1 | 0 | 0 | 1 | 0 | 0 | 1 |
| 2555 | maize  |      |       |       | 1 | 0 | 0 | 1 | 0 | 0 | 1 |
| 2555 | maize  |      |       |       | 1 | 0 | 0 | 1 | 0 | 0 | 1 |
| 2555 | maize  |      | -74.7 |       | 1 | 0 | 0 | 1 | 0 | 0 | 1 |
| 2555 | maize  |      |       |       | 1 | 0 | 0 | 1 | 0 | 0 | 1 |
| 2555 | maize  |      |       |       | 1 | 0 | 0 | 1 | 0 | 0 | 1 |
| 2555 | maize  |      |       |       | 1 | 1 | 0 | 1 | 0 | 0 | 1 |
| 2555 | maize  |      |       |       | 1 | 0 | 0 | 1 | 0 | 0 | 1 |
| 2555 | maize  |      |       |       | 1 | 0 | 0 | 1 | 0 | 0 | 1 |
| 2555 | maize  |      |       |       | 1 | 1 | 0 | 1 | 0 | 0 | 1 |
| 2555 | maize  |      |       |       | 1 | 1 | 0 | 1 | 0 | 0 | 1 |
| 2555 | maize  |      |       |       | 1 | 1 | 0 | 1 | 0 | 0 | 1 |

|      |        |       |       |      |   |   |   |   |   |   |   |
|------|--------|-------|-------|------|---|---|---|---|---|---|---|
| 2555 | maize  |       |       | 1    | 0 | 0 | 1 | 0 | 0 | 1 |   |
| 2555 | maize  | -74.2 |       | 1    | 0 | 0 | 1 | 0 | 0 | 1 |   |
| 2555 | maize  |       |       | 1    | 1 | 0 | 1 | 0 | 0 | 1 |   |
| 2556 | maize  | 0.0   |       | 1    | 0 | 0 | 0 | 0 | 0 | 1 |   |
| 2556 | maize  | 20.0  |       | 1    | 0 | 0 | 0 | 0 | 0 | 1 |   |
| 2556 | maize  |       |       | 1    | 1 | 0 | 0 | 0 | 0 | 1 |   |
| 2556 | maize  |       | 23.0  | 1    | 1 | 0 | 0 | 0 | 0 | 1 |   |
| 2556 | maize  | 23.0  |       | 1    | 1 | 0 | 0 | 0 | 0 | 1 |   |
| 2562 | cotton | 44.7  |       | 1    | 0 | 0 | 1 | 0 | 0 | 1 |   |
| 2562 | cotton | 61.0  |       | 1    | 0 | 0 | 1 | 0 | 0 | 1 |   |
| 2562 | cotton |       | -21.1 | 1    | 0 | 0 | 1 | 0 | 0 | 1 |   |
| 2562 | cotton |       |       | 40.9 | 1 | 0 | 0 | 1 | 0 | 0 | 1 |
| 2562 | cotton |       |       | 75.7 | 1 | 0 | 0 | 1 | 0 | 0 | 1 |
| 2562 | cotton |       | -27.8 | 1    | 0 | 0 | 1 | 0 | 0 | 1 |   |
| 2562 | cotton |       |       | 1    | 0 | 0 | 1 | 0 | 0 | 1 |   |
| 2562 | cotton |       |       | 1    | 0 | 0 | 1 | 0 | 0 | 1 |   |
| 2571 | cotton |       | -26.8 | 1    | 0 | 0 | 1 | 0 | 0 | 1 |   |
| 2571 | cotton |       | -47.1 | 1    | 0 | 0 | 1 | 0 | 0 | 1 |   |
| 2571 | cotton | 5.9   |       | 1    | 0 | 0 | 1 | 0 | 0 | 1 |   |
| 2571 | cotton |       |       | 1    | 0 | 0 | 1 | 0 | 0 | 1 |   |
| 2571 | cotton |       |       | 1    | 0 | 0 | 1 | 0 | 0 | 1 |   |
| 2571 | cotton |       | -4.2  | 1    | 0 | 0 | 1 | 0 | 0 | 1 |   |
| 2571 | cotton |       |       | 17.9 | 1 | 0 | 0 | 1 | 0 | 0 | 1 |
| 2571 | cotton | 39.4  |       | 1    | 0 | 0 | 1 | 0 | 0 | 1 |   |
| 2571 | cotton |       |       | 77.7 | 1 | 0 | 0 | 1 | 0 | 0 | 1 |
| 2571 | cotton |       |       | 1    | 0 | 0 | 1 | 0 | 0 | 1 |   |
| 2571 | cotton |       |       | 1    | 0 | 0 | 1 | 0 | 0 | 1 |   |
| 2571 | cotton |       |       | 1    | 0 | 0 | 1 | 0 | 0 | 1 |   |
| 2571 | cotton |       |       | 1    | 0 | 0 | 1 | 0 | 0 | 1 |   |
| 2571 | cotton |       | 4.5   | 1    | 0 | 0 | 1 | 0 | 0 | 1 |   |
| 2571 | cotton |       | -21.1 | 1    | 0 | 0 | 1 | 0 | 0 | 1 |   |
| 2571 | cotton |       |       | 1    | 0 | 0 | 1 | 0 | 0 | 1 |   |
| 2571 | cotton |       |       | 1    | 0 | 0 | 1 | 0 | 0 | 1 |   |
| 2571 | cotton |       | -52.8 | 1    | 0 | 0 | 1 | 0 | 0 | 1 |   |
| 2577 | cotton |       |       | 1    | 0 | 0 | 1 | 0 | 1 | 1 |   |
| 2577 | cotton |       |       | 1    | 0 | 0 | 1 | 0 | 1 | 1 |   |
| 2577 | cotton |       | -9.6  | 1    | 0 | 0 | 1 | 0 | 1 | 1 |   |
| 2577 | cotton | 39.2  |       | 1    | 1 | 0 | 1 | 0 | 1 | 1 |   |
| 2577 | cotton |       |       | 1    | 0 | 0 | 1 | 0 | 1 | 1 |   |
| 2577 | cotton |       | -18.2 | 1    | 0 | 0 | 1 | 0 | 1 | 1 |   |
| 2577 | cotton |       |       | 1.5  | 1 | 0 | 0 | 1 | 0 | 1 | 1 |
| 2577 | cotton | -29.8 |       | 1    | 0 | 0 | 1 | 0 | 1 | 1 |   |
| 2577 | cotton |       |       | 1    | 0 | 0 | 1 | 0 | 1 | 1 |   |
| 2577 | cotton |       |       | 1    | 0 | 0 | 1 | 0 | 1 | 1 |   |
| 2577 | cotton |       |       | 1    | 0 | 0 | 1 | 0 | 1 | 1 |   |
| 2577 | cotton | 41.2  |       | 1    | 1 | 0 | 1 | 0 | 1 | 1 |   |
| 2577 | cotton |       |       | 1    | 0 | 0 | 1 | 0 | 1 | 1 |   |
| 2577 | cotton |       |       | 1    | 0 | 0 | 1 | 0 | 1 | 1 |   |
| 2577 | cotton |       |       | 1    | 0 | 0 | 1 | 0 | 1 | 1 |   |
| 2577 | cotton |       |       | 1    | 0 | 0 | 1 | 0 | 1 | 1 |   |
| 2577 | cotton |       |       | 1    | 0 | 0 | 1 | 0 | 1 | 1 |   |
| 2577 | cotton |       | 17.0  | 1    | 0 | 0 | 1 | 0 | 1 | 1 |   |
| 2577 | cotton | 31.6  |       | 1    | 0 | 0 | 1 | 0 | 1 | 1 |   |
| 2577 | cotton |       |       | 1    | 0 | 0 | 1 | 0 | 1 | 1 |   |
| 2577 | cotton |       | 11.5  | 1    | 0 | 0 | 1 | 0 | 1 | 1 |   |
| 2580 | cotton |       |       | 1    | 0 | 0 | 1 | 0 | 1 | 1 |   |
| 2580 | cotton |       |       | 1    | 0 | 0 | 1 | 0 | 1 | 1 |   |
| 2580 | cotton |       |       |      | 1 | 0 | 1 | 0 | 1 | 1 |   |
| 2580 | cotton | 64.9  |       | 1    | 0 | 0 | 1 | 0 | 1 | 1 |   |
| 2580 | cotton | 11.2  |       | 1    | 1 | 0 | 1 | 0 | 1 | 1 |   |
| 2580 | cotton |       |       | 1    | 0 | 0 | 1 | 0 | 1 | 1 |   |
| 2580 | cotton |       | -8.3  | 1    | 0 | 0 | 1 | 0 | 1 | 1 |   |
| 2580 | cotton |       |       | 1    | 0 | 0 | 1 | 0 | 1 | 1 |   |
| 2580 | cotton |       |       | 1    | 0 | 0 | 1 | 0 | 1 | 1 |   |
| 2580 | cotton | 36.2  |       | 1    | 1 | 0 | 1 | 0 | 1 | 1 |   |
| 2580 | cotton |       |       | 1    | 0 | 0 | 1 | 0 | 1 | 1 |   |
| 2601 | cotton |       | 11.9  | 1    | 0 | 0 | 1 | 0 | 1 | 1 |   |



|      |         |       |       |       |   |   |   |   |   |   |   |
|------|---------|-------|-------|-------|---|---|---|---|---|---|---|
| 2601 | cotton  |       |       |       | 1 | 0 | 0 | 1 | 0 | 1 | 1 |
| 2601 | cotton  |       |       |       | 1 | 0 | 0 | 1 | 0 | 1 | 1 |
| 2601 | cotton  |       |       |       | 1 | 0 | 0 | 1 | 0 | 1 | 1 |
| 2601 | cotton  |       |       |       | 1 | 0 | 0 | 1 | 0 | 1 | 1 |
| 2601 | cotton  | 43.4  |       |       | 1 | 0 | 0 | 1 | 0 | 1 | 1 |
| 2601 | cotton  |       | -23.9 |       | 1 | 0 | 0 | 1 | 0 | 1 | 1 |
| 2632 | maize   |       |       | 16.5  | 1 | 1 | 0 | 0 | 0 | 1 | 1 |
| 2632 | maize   | 17.1  |       |       | 1 | 1 | 0 | 0 | 0 | 1 | 1 |
| 2702 | soybean |       |       |       | 0 | 0 | 0 | 0 | 0 | 0 | 0 |
| 2702 | soybean | 1.2   |       |       | 0 | 0 | 0 | 0 | 0 | 0 | 0 |
| 2702 | soybean |       |       |       | 0 | 0 | 0 | 0 | 0 | 0 | 0 |
| 2702 | soybean | 3.1   |       |       | 0 | 0 | 0 | 0 | 0 | 0 | 0 |
| 2771 | maize   |       |       | 30.0  | 1 | 0 | 0 | 1 | 0 | 1 | 1 |
| 2771 | maize   |       |       | 27.6  | 0 | 0 | 0 | 1 | 0 | 1 | 1 |
| 2771 | maize   |       | -68.8 |       | 0 | 0 | 0 | 1 | 0 | 1 | 1 |
| 2771 | maize   |       |       | -5.1  | 0 | 0 | 0 | 1 | 0 | 1 | 1 |
| 2771 | maize   | 4.9   |       |       | 1 | 0 | 0 | 1 | 0 | 1 | 1 |
| 2771 | maize   |       |       | 0.4   | 1 | 0 | 0 | 1 | 0 | 1 | 1 |
| 2771 | maize   |       | -90.8 |       | 1 | 0 | 0 | 1 | 0 | 1 | 1 |
| 2771 | maize   |       |       |       |   | 1 | 0 | 1 | 0 | 1 | 1 |
| 2771 | maize   | 0.0   |       |       | 0 | 0 | 0 | 1 | 0 | 1 | 1 |
| 2776 | cotton  |       | -29.9 |       | 1 | 0 | 0 | 0 | 0 | 0 | 0 |
| 2776 | cotton  | -53.5 |       |       | 1 | 0 | 0 | 0 | 0 | 0 | 0 |
| 2776 | cotton  | 3.4   |       |       | 1 | 0 | 0 | 0 | 0 | 0 | 0 |
| 2778 | cotton  |       | -64.0 |       | 1 | 0 | 0 | 0 | 0 | 0 | 0 |
| 2778 | cotton  |       |       | -35.1 | 1 | 0 | 0 | 0 | 0 | 0 | 0 |
| 2778 | cotton  | 5.0   |       |       | 1 | 0 | 0 | 0 | 0 | 0 | 0 |
| 2778 | cotton  |       |       | -38.2 | 1 | 0 | 0 | 0 | 0 | 0 | 0 |
| 2779 | maize   |       |       |       | 1 | 0 | 0 | 0 | 0 | 0 | 1 |
| 2779 | maize   | 2.0   |       |       | 1 | 0 | 0 | 0 | 0 | 0 | 1 |
| 2779 | soybean |       |       |       | 0 | 0 | 0 | 0 | 0 | 0 | 1 |
| 2779 | soybean | -3.6  |       |       | 0 | 0 | 0 | 0 | 0 | 0 | 1 |
| 2779 | soybean |       | -23.6 |       | 0 | 0 | 0 | 0 | 0 | 0 | 1 |
| 2779 | maize   |       |       |       | 1 | 0 | 0 | 0 | 0 | 0 | 1 |
| 2779 | soybean |       |       | -22.0 | 0 | 0 | 0 | 0 | 0 | 0 | 1 |
| 2780 | soybean |       |       | -26.1 | 0 | 0 | 0 | 0 | 0 | 0 | 0 |
| 2780 | soybean |       |       |       | 0 | 0 | 0 | 0 | 0 | 0 | 0 |
| 2780 | maize   |       |       |       | 1 | 0 | 0 | 0 | 0 | 0 | 0 |
| 2780 | maize   |       |       | 12.5  | 1 | 0 | 0 | 0 | 0 | 0 | 0 |
| 2780 | soybean |       |       | -6.4  | 0 | 0 | 0 | 0 | 0 | 0 | 0 |
| 2780 | soybean |       |       | -26.4 | 0 | 0 | 0 | 0 | 0 | 0 | 0 |
| 2780 | maize   |       |       |       | 1 | 0 | 0 | 0 | 0 | 0 | 0 |
| 2801 | soybean | 13.0  |       |       | 0 | 0 | 0 | 0 | 0 | 1 | 1 |
| 2801 | soybean | -14.7 |       |       | 0 | 0 | 0 | 0 | 0 | 1 | 1 |
| 2801 | soybean |       |       | 2.5   | 0 | 0 | 0 | 0 | 0 | 1 | 1 |
| 2801 | soybean |       |       | 3.7   | 0 | 0 | 0 | 0 | 0 | 1 | 1 |
| 2801 | soybean |       |       | 6.2   | 0 | 0 | 0 | 0 | 0 | 1 | 1 |
| 2801 | soybean | 18.2  |       |       | 0 | 0 | 0 | 0 | 0 | 1 | 1 |
| 2801 | soybean | 15.4  |       |       | 0 | 0 | 0 | 0 | 0 | 1 | 1 |
| 2801 | soybean |       |       | 4.9   | 0 | 0 | 0 | 0 | 0 | 1 | 1 |
| 2827 | cotton  |       | -24.0 |       | 1 | 0 | 0 | 1 | 0 | 1 | 1 |
| 2827 | cotton  |       |       | 22.3  | 1 | 0 | 0 | 1 | 0 | 1 | 1 |
| 2827 | cotton  |       |       | -27.2 | 1 | 0 | 0 | 1 | 0 | 1 | 1 |
| 2827 | cotton  |       |       |       | 1 | 0 | 0 | 1 | 0 | 1 | 1 |
| 2827 | cotton  | 23.4  |       |       | 1 | 0 | 0 | 1 | 0 | 1 | 1 |
| 2827 | cotton  |       |       |       | 1 | 0 | 0 | 1 | 0 | 1 | 1 |
| 2836 | cotton  |       |       | -18.0 | 1 | 1 | 0 | 1 | 0 | 0 | 0 |
| 2836 | cotton  |       |       | 5.9   | 1 | 1 | 0 | 1 | 0 | 0 | 0 |
| 2836 | cotton  |       |       | 36.5  | 1 | 0 | 0 | 1 | 0 | 0 | 0 |
| 2836 | cotton  | 28.5  |       |       | 1 | 0 | 0 | 1 | 0 | 0 | 0 |
| 2836 | cotton  |       |       | 3.3   | 1 | 1 | 0 | 1 | 0 | 0 | 0 |
| 2836 | cotton  |       |       |       | 1 | 0 | 0 | 1 | 0 | 0 | 0 |
| 2836 | cotton  | 46.3  |       |       | 1 | 0 | 0 | 1 | 0 | 0 | 0 |
| 2836 | cotton  | 44.6  |       |       | 1 | 0 | 0 | 1 | 0 | 0 | 0 |
| 2836 | cotton  |       |       |       | 1 | 1 | 0 | 1 | 0 | 0 | 0 |
| 2836 | cotton  |       |       |       | 1 | 0 | 0 | 1 | 0 | 0 | 0 |

|      |        |       |       |       |   |   |   |   |   |   |
|------|--------|-------|-------|-------|---|---|---|---|---|---|
| 2836 | cotton |       |       | 1     | 0 | 0 | 1 | 0 | 0 | 0 |
| 2836 | cotton |       |       | 1     | 1 | 0 | 1 | 0 | 0 | 0 |
| 2836 | cotton |       |       | 1     | 0 | 0 | 1 | 0 | 0 | 0 |
| 2836 | cotton |       | -28.2 | 1     | 0 | 0 | 1 | 0 | 0 | 0 |
| 2836 | cotton |       | 13.5  | 1     | 1 | 0 | 1 | 0 | 0 | 0 |
| 2836 | cotton |       |       | 58.1  | 1 | 0 | 1 | 0 | 0 | 0 |
| 2836 | cotton |       | 5.6   | 1     | 0 | 0 | 1 | 0 | 0 | 0 |
| 2836 | cotton |       |       | 1     | 1 | 0 | 1 | 0 | 0 | 0 |
| 2836 | cotton |       |       | 1     | 0 | 0 | 1 | 0 | 0 | 0 |
| 2836 | cotton |       |       | 106.9 | 1 | 1 | 1 | 0 | 0 | 0 |
| 2836 | cotton |       |       | 1     | 0 | 0 | 1 | 0 | 0 | 0 |
| 2836 | cotton |       |       | 1     | 0 | 0 | 1 | 0 | 0 | 0 |
| 2836 | cotton |       |       | 164.1 | 1 | 0 | 1 | 0 | 0 | 0 |
| 2836 | cotton |       |       | 1     | 1 | 0 | 1 | 0 | 0 | 0 |
| 2836 | cotton |       |       | 75.8  | 1 | 0 | 1 | 0 | 0 | 0 |
| 2836 | cotton |       |       | 247.1 | 1 | 0 | 1 | 0 | 0 | 0 |
| 2836 | cotton |       |       | 1     | 1 | 0 | 1 | 0 | 0 | 0 |
| 2836 | cotton |       | 13.7  | 1     | 0 | 0 | 1 | 0 | 0 | 0 |
| 2836 | cotton |       |       | 1     | 0 | 0 | 1 | 0 | 0 | 0 |
| 2836 | cotton |       |       | 1     | 0 | 0 | 1 | 0 | 0 | 0 |
| 2836 | cotton |       |       | 1     | 0 | 0 | 1 | 0 | 0 | 0 |
| 2836 | cotton |       | -21.3 | 1     | 0 | 0 | 1 | 0 | 0 | 0 |
| 2836 | cotton |       | -28.5 | 1     | 1 | 0 | 1 | 0 | 0 | 0 |
| 2836 | cotton |       |       | 1     | 0 | 0 | 1 | 0 | 0 | 0 |
| 2836 | cotton |       |       | 1     | 1 | 0 | 1 | 0 | 0 | 0 |
| 2836 | cotton |       | 13.7  | 1     | 0 | 0 | 1 | 0 | 0 | 0 |
| 2836 | cotton | 43.7  |       | 1     | 1 | 0 | 1 | 0 | 0 | 0 |
| 2836 | cotton |       |       | 1     | 0 | 0 | 1 | 0 | 0 | 0 |
| 2836 | cotton |       |       | 1     | 1 | 0 | 1 | 0 | 0 | 0 |
| 2836 | cotton |       |       | 74.5  | 1 | 1 | 1 | 0 | 0 | 0 |
| 2836 | cotton |       | -54.5 | 1     | 0 | 0 | 1 | 0 | 0 | 0 |
| 2836 | cotton | 35.4  |       | 1     | 1 | 0 | 1 | 0 | 0 | 0 |
| 2836 | cotton |       |       | 1     | 0 | 0 | 1 | 0 | 0 | 0 |
| 2836 | cotton |       |       | 143.2 | 1 | 1 | 1 | 0 | 0 | 0 |
| 2836 | cotton | 24.7  |       | 1     | 1 | 0 | 1 | 0 | 0 | 0 |
| 2836 | cotton |       |       | 1     | 1 | 0 | 1 | 0 | 0 | 0 |
| 2836 | cotton |       |       | 1     | 1 | 0 | 1 | 0 | 0 | 0 |
| 2836 | cotton |       |       | 1     | 0 | 0 | 1 | 0 | 0 | 0 |
| 2836 | cotton | 35.4  |       | 1     | 0 | 0 | 1 | 0 | 0 | 0 |
| 2836 | cotton |       |       | 1     | 1 | 0 | 1 | 0 | 0 | 0 |
| 2836 | cotton |       |       | 1     | 0 | 0 | 1 | 0 | 0 | 0 |
| 2836 | cotton |       | -44.8 | 1     | 1 | 0 | 1 | 0 | 0 | 0 |
| 2836 | cotton |       |       | 1     | 1 | 0 | 1 | 0 | 0 | 0 |
| 2836 | cotton |       |       | 1     | 1 | 0 | 1 | 0 | 0 | 0 |
| 2836 | cotton |       |       | 1     | 0 | 0 | 1 | 0 | 0 | 0 |
| 2836 | cotton |       | -18.0 | 1     | 0 | 0 | 1 | 0 | 0 | 0 |
| 2875 | cotton |       |       | 1     | 0 | 0 | 1 | 0 | 0 | 0 |
| 2875 | cotton |       |       | 1     | 1 | 0 | 1 | 0 | 0 | 0 |
| 2875 | cotton | -17.4 |       | 1     | 0 | 0 | 1 | 0 | 0 | 0 |
| 2875 | cotton |       |       | 1     | 1 | 0 | 1 | 0 | 0 | 0 |
| 2875 | cotton |       |       | 1     | 1 | 0 | 1 | 0 | 0 | 0 |
| 2875 | cotton |       |       | 1     | 1 | 0 | 1 | 0 | 0 | 0 |
| 2875 | cotton |       |       | 1     | 1 | 0 | 1 | 0 | 0 | 0 |
| 2875 | cotton |       | -5.0  | 1     | 0 | 0 | 1 | 0 | 0 | 0 |
| 2875 | cotton |       |       | 1     | 0 | 0 | 1 | 0 | 0 | 0 |
| 2875 | cotton |       |       | 1     | 0 | 0 | 1 | 0 | 0 | 0 |
| 2875 | cotton |       |       | 1     | 1 | 0 | 1 | 0 | 0 | 0 |
| 2875 | cotton |       |       | 1     | 1 | 0 | 1 | 0 | 0 | 0 |
| 2875 | cotton |       |       | 1     | 0 | 0 | 1 | 0 | 0 | 0 |
| 2875 | cotton |       | -50.0 | 1     | 0 | 0 | 1 | 0 | 0 | 0 |
| 2875 | cotton |       |       | 1     | 1 | 0 | 1 | 0 | 0 | 0 |
| 2875 | cotton |       |       | 1     | 1 | 0 | 1 | 0 | 0 | 0 |
| 2875 | cotton | -25.0 |       | 1     | 0 | 0 | 1 | 0 | 0 | 0 |
| 2875 | cotton |       |       | 1     | 1 | 0 | 1 | 0 | 0 | 0 |
| 2875 | cotton |       |       | 1     | 1 | 0 | 1 | 0 | 0 | 0 |
| 2875 | cotton |       |       | 1     | 1 | 0 | 1 | 0 | 0 | 0 |
| 2875 | cotton |       |       | 1     | 1 | 0 | 1 | 0 | 0 | 0 |

|      |         |       |       |       |   |   |   |   |   |   |
|------|---------|-------|-------|-------|---|---|---|---|---|---|
| 2875 | cotton  |       |       | 1     | 1 | 0 | 1 | 0 | 0 | 0 |
| 2875 | cotton  |       | -58.4 | 1     | 0 | 0 | 1 | 0 | 0 | 0 |
| 2875 | cotton  |       |       | 1     | 0 | 0 | 1 | 0 | 0 | 0 |
| 2896 | maize   | 7.1   |       | 1     | 0 | 0 | 0 | 0 | 0 | 0 |
| 2896 | soybean | -3.2  |       | 0     | 0 | 0 | 0 | 0 | 0 | 0 |
| 2896 | maize   | 19.6  |       | 1     | 0 | 0 | 0 | 0 | 0 | 0 |
| 2896 | soybean | -0.8  |       | 0     | 0 | 0 | 0 | 0 | 0 | 0 |
| 2896 | maize   | -0.1  |       | 1     | 0 | 0 | 0 | 0 | 0 | 0 |
| 2896 | soybean | -4.2  |       | 0     | 0 | 0 | 0 | 0 | 0 | 0 |
| 2896 | soybean | -6.1  |       | 0     | 0 | 0 | 0 | 0 | 0 | 0 |
| 2896 | maize   | 14.8  |       | 1     | 0 | 0 | 0 | 0 | 0 | 0 |
| 2896 | soybean | 2.8   |       | 0     | 0 | 0 | 0 | 0 | 0 | 0 |
| 2896 | maize   | 14.2  |       | 1     | 0 | 0 | 0 | 0 | 0 | 0 |
| 2896 | soybean | -1.2  |       | 0     | 0 | 0 | 0 | 0 | 0 | 0 |
| 2896 | soybean | 17.6  |       | 0     | 0 | 0 | 0 | 0 | 0 | 0 |
| 2896 | maize   | 5.8   |       | 1     | 0 | 0 | 0 | 0 | 0 | 0 |
| 2896 | maize   | 13.0  |       | 1     | 0 | 0 | 0 | 0 | 0 | 0 |
| 2896 | soybean | -10.8 |       | 0     | 0 | 0 | 0 | 0 | 0 | 0 |
| 2896 | maize   | -4.2  |       | 1     | 0 | 0 | 0 | 0 | 0 | 0 |
| 2896 | maize   | 23.6  |       | 1     | 0 | 0 | 0 | 0 | 0 | 0 |
| 2896 | maize   | 5.2   |       | 1     | 0 | 0 | 0 | 0 | 0 | 0 |
| 2896 | soybean | 15.1  |       | 0     | 0 | 0 | 0 | 0 | 0 | 0 |
| 2896 | soybean | 3.9   |       | 0     | 0 | 0 | 0 | 0 | 0 | 0 |
| 2896 | soybean | 28.3  |       | 0     | 0 | 0 | 0 | 0 | 0 | 0 |
| 2896 | soybean | 8.7   |       | 0     | 0 | 0 | 0 | 0 | 0 | 0 |
| 2896 | soybean | 2.6   |       | 0     | 0 | 0 | 0 | 0 | 0 | 0 |
| 2896 | maize   | 14.1  |       | 1     | 0 | 0 | 0 | 0 | 0 | 0 |
| 2896 | soybean | -3.9  |       | 0     | 0 | 0 | 0 | 0 | 0 | 0 |
| 2896 | maize   | -17.4 |       | 1     | 0 | 0 | 0 | 0 | 0 | 0 |
| 2896 | maize   | -40.7 |       | 1     | 0 | 0 | 0 | 0 | 0 | 0 |
| 2896 | soybean | 15.0  |       | 0     | 0 | 0 | 0 | 0 | 0 | 0 |
| 2896 | soybean | 0.0   |       | 0     | 0 | 0 | 0 | 0 | 0 | 0 |
| 2896 | maize   | 12.1  |       | 1     | 0 | 0 | 0 | 0 | 0 | 0 |
| 2896 | maize   | 9.7   |       | 1     | 0 | 0 | 0 | 0 | 0 | 0 |
| 2930 | cotton  |       | -71.3 | 1     | 0 | 0 | 1 | 0 | 0 | 1 |
| 2930 | cotton  | 46.0  |       | 1     | 0 | 0 | 1 | 0 | 0 | 1 |
| 2930 | cotton  | 26.6  |       | 1     | 0 | 0 | 1 | 0 | 0 | 1 |
| 2930 | cotton  |       | -78.5 | 1     | 0 | 0 | 1 | 0 | 0 | 1 |
| 2930 | cotton  | 58.2  |       | 1     | 0 | 0 | 1 | 0 | 0 | 1 |
| 2930 | cotton  |       |       | 211.7 | 1 | 0 | 1 | 0 | 0 | 1 |
| 2930 | cotton  |       | -80.5 | 1     | 0 | 0 | 1 | 0 | 0 | 1 |
| 2930 | cotton  |       | -71.5 | 1     | 0 | 0 | 1 | 0 | 0 | 1 |
| 2930 | cotton  |       | -71.6 | 1     | 0 | 0 | 1 | 0 | 0 | 1 |
| 2930 | cotton  |       |       | 46.0  | 1 | 0 | 1 | 0 | 0 | 1 |
| 2930 | cotton  |       | -63.7 | 1     | 0 | 0 | 1 | 0 | 0 | 1 |
| 2930 | cotton  |       |       | 162.6 | 1 | 0 | 1 | 0 | 0 | 1 |
| 2930 | cotton  | 49.9  |       | 1     | 0 | 0 | 1 | 0 | 0 | 1 |
| 2930 | cotton  |       | -81.7 | 1     | 0 | 0 | 1 | 0 | 0 | 1 |
| 2930 | cotton  |       | -72.3 | 1     | 0 | 0 | 1 | 0 | 0 | 1 |
| 2930 | cotton  |       | -88.1 | 1     | 0 | 0 | 1 | 0 | 0 | 1 |
| 2930 | cotton  |       | -68.2 | 1     | 0 | 0 | 1 | 0 | 0 | 1 |
| 2930 | cotton  |       | -59.5 | 1     | 0 | 0 | 1 | 0 | 0 | 1 |
| 2930 | cotton  |       | -79.4 | 1     | 0 | 0 | 1 | 0 | 0 | 1 |
| 2930 | cotton  | 32.8  |       | 1     | 0 | 0 | 1 | 0 | 0 | 1 |
| 2930 | cotton  |       | -62.0 | 1     | 0 | 0 | 1 | 0 | 0 | 1 |
| 2930 | cotton  |       | -78.5 | 1     | 0 | 0 | 1 | 0 | 0 | 1 |
| 2930 | cotton  |       |       | 89.8  | 1 | 0 | 1 | 0 | 0 | 1 |
| 2930 | cotton  |       |       | 8.3   | 1 | 0 | 1 | 0 | 0 | 1 |
| 2930 | cotton  | 41.8  |       | 1     | 0 | 0 | 1 | 0 | 0 | 1 |
| 2984 | cotton  |       | 63.2  | 1     | 0 | 0 | 1 | 0 | 0 | 0 |
| 2984 | cotton  |       | -57.9 | 1     | 0 | 0 | 1 | 0 | 0 | 0 |
| 2984 | cotton  | 23.7  |       | 1     | 0 | 0 | 1 | 0 | 0 | 0 |
| 2984 | cotton  |       | -3.6  | 1     | 0 | 0 | 1 | 0 | 0 | 0 |
| 2984 | cotton  | 25.0  |       | 1     | 0 | 0 | 1 | 0 | 0 | 0 |
| 2984 | cotton  | 82.3  |       | 1     | 0 | 0 | 1 | 0 | 0 | 0 |
| 2984 | cotton  |       | -13.6 | 1     | 0 | 0 | 1 | 0 | 0 | 0 |
| 3022 | maize   | 29.7  |       | 1     | 0 | 0 | 0 | 0 | 0 | 0 |

|      |         |       |  |       |       |   |   |   |   |   |   |
|------|---------|-------|--|-------|-------|---|---|---|---|---|---|
| 3022 | maize   | 7.5   |  |       | 1     | 0 | 0 | 0 | 0 | 0 | 0 |
| 3022 | maize   | 9.4   |  |       | 1     | 0 | 0 | 0 | 0 | 0 | 0 |
| 3022 | maize   |       |  | -2.8  | 1     | 0 | 0 | 0 | 0 | 0 | 0 |
| 3022 | maize   |       |  |       | 1     | 0 | 0 | 0 | 0 | 0 | 0 |
| 3022 | maize   |       |  |       | 1     | 0 | 0 | 0 | 0 | 0 | 0 |
| 3022 | maize   | 8.2   |  |       | 1     | 0 | 0 | 0 | 0 | 0 | 0 |
| 3047 | cotton  |       |  |       | 1     | 0 | 0 | 1 | 0 | 1 | 1 |
| 3047 | cotton  |       |  |       | 69.0  | 1 | 0 | 0 | 1 | 0 | 1 |
| 3047 | cotton  | 34.2  |  |       | 1     | 0 | 0 | 1 | 0 | 1 | 1 |
| 3047 | cotton  | 60.2  |  |       | 1     | 1 | 0 | 1 | 0 | 1 | 1 |
| 3047 | cotton  |       |  | -38.4 | 1     | 0 | 0 | 1 | 0 | 1 | 1 |
| 3047 | cotton  |       |  |       | 1     | 0 | 0 | 1 | 0 | 1 | 1 |
| 3047 | cotton  | 44.2  |  | -40.9 | 1     | 1 | 0 | 1 | 0 | 1 | 1 |
| 3047 | cotton  |       |  |       | 1     | 0 | 0 | 1 | 0 | 1 | 1 |
| 3047 | cotton  |       |  |       | 1     | 0 | 0 | 1 | 0 | 1 | 1 |
| 3047 | cotton  |       |  |       | 1     | 0 | 0 | 1 | 0 | 1 | 1 |
| 3047 | cotton  |       |  | -50.4 | 1     | 0 | 0 | 1 | 0 | 1 | 1 |
| 3047 | cotton  |       |  |       | 16.8  | 1 | 0 | 0 | 1 | 0 | 1 |
| 3096 | soybean |       |  |       | 0     | 0 | 0 | 0 | 0 | 0 | 0 |
| 3096 | soybean |       |  | -1.6  | 0     | 0 | 0 | 0 | 0 | 0 | 0 |
| 3096 | cotton  |       |  |       | 1     | 0 | 0 | 0 | 0 | 0 | 0 |
| 3096 | cotton  |       |  | -6.8  | 1     | 0 | 0 | 0 | 0 | 0 | 0 |
| 3096 | cotton  |       |  | -9.1  | 1     | 0 | 0 | 0 | 0 | 0 | 0 |
| 3096 | soybean |       |  | -8.0  | 0     | 0 | 0 | 0 | 0 | 0 | 0 |
| 3128 | cotton  |       |  |       | 1     | 0 | 0 | 1 | 0 | 0 | 0 |
| 3128 | cotton  |       |  |       | 17.3  | 1 | 0 | 0 | 1 | 0 | 0 |
| 3128 | cotton  |       |  |       | 1     | 0 | 0 | 1 | 0 | 0 | 0 |
| 3128 | cotton  |       |  |       | 1     | 0 | 0 | 1 | 0 | 0 | 0 |
| 3128 | cotton  |       |  |       | 1     | 0 | 0 | 1 | 0 | 0 | 0 |
| 3128 | cotton  |       |  |       | 10.4  | 1 | 0 | 0 | 1 | 0 | 0 |
| 3128 | cotton  |       |  |       | 1     | 0 | 0 | 1 | 0 | 0 | 0 |
| 3128 | cotton  | 5.4   |  |       | 1     | 0 | 0 | 1 | 0 | 0 | 0 |
| 3128 | cotton  |       |  |       | 1     | 0 | 0 | 1 | 0 | 0 | 0 |
| 3128 | cotton  |       |  |       | 8.1   | 1 | 0 | 0 | 1 | 0 | 0 |
| 3128 | cotton  | -34.8 |  |       | 1     | 0 | 0 | 1 | 0 | 0 | 0 |
| 3128 | cotton  | 3.4   |  |       | 1     | 0 | 0 | 1 | 0 | 0 | 0 |
| 3128 | cotton  |       |  |       | -8.9  | 1 | 0 | 0 | 1 | 0 | 0 |
| 3133 | cotton  |       |  |       | 1     | 0 | 0 | 1 | 0 | 1 | 1 |
| 3133 | cotton  |       |  |       | 1     | 0 | 0 | 1 | 0 | 1 | 1 |
| 3133 | cotton  | 20.7  |  |       | 1     | 0 | 0 | 1 | 0 | 1 | 1 |
| 3133 | cotton  | 29.6  |  |       | 1     | 0 | 0 | 1 | 0 | 1 | 1 |
| 3133 | cotton  |       |  |       | 1     | 0 | 0 | 1 | 0 | 1 | 1 |
| 3133 | cotton  |       |  |       | 1     | 0 | 0 | 1 | 0 | 1 | 1 |
| 3133 | cotton  |       |  |       | 21.2  | 1 | 0 | 0 | 1 | 0 | 1 |
| 3133 | cotton  |       |  |       | 27.2  | 1 | 0 | 0 | 1 | 0 | 1 |
| 3133 | cotton  |       |  |       | 20.4  | 1 | 0 | 0 | 1 | 0 | 1 |
| 3133 | cotton  |       |  |       | 41.0  | 1 | 0 | 0 | 1 | 0 | 1 |
| 3152 | cotton  | 0.0   |  |       | 1     | 0 | 0 | 1 | 0 | 0 | 0 |
| 3152 | cotton  |       |  | -7.9  | 1     | 0 | 0 | 1 | 0 | 0 | 0 |
| 3152 | cotton  |       |  |       | 15.4  | 1 | 0 | 0 | 1 | 0 | 0 |
| 3152 | cotton  |       |  |       | -5.1  | 1 | 0 | 0 | 1 | 0 | 0 |
| 3153 | cotton  |       |  |       | 1     | 0 | 0 | 1 | 0 | 0 | 0 |
| 3153 | cotton  | -15.4 |  |       | 1     | 0 | 0 | 1 | 0 | 0 | 0 |
| 3153 | cotton  |       |  |       | 1     | 0 | 0 | 1 | 0 | 0 | 0 |
| 3153 | cotton  |       |  |       | -48.3 | 1 | 0 | 0 | 1 | 0 | 0 |
| 3153 | cotton  |       |  |       | 1     | 0 | 0 | 1 | 0 | 0 | 0 |
| 3153 | cotton  | -13.6 |  |       | 1     | 0 | 0 | 1 | 0 | 0 | 0 |
| 3153 | cotton  |       |  |       | -14.2 | 1 | 0 | 0 | 1 | 0 | 0 |
| 3153 | cotton  |       |  |       | 20.8  | 1 | 0 | 0 | 1 | 0 | 0 |
| 3153 | cotton  | -16.7 |  |       | 1     | 0 | 0 | 1 | 0 | 0 | 0 |
| 3153 | cotton  |       |  |       | 1     | 0 | 0 | 1 | 0 | 0 | 0 |
| 3153 | cotton  |       |  |       | 1     | 0 | 0 | 1 | 0 | 0 | 0 |
| 3153 | cotton  |       |  |       | -38.6 | 1 | 0 | 0 | 1 | 0 | 0 |
| 3227 | cotton  | 6.1   |  |       | 1     | 0 | 0 | 1 | 0 | 1 | 1 |
| 3227 | cotton  |       |  |       | 1     | 0 | 0 | 1 | 0 | 1 | 1 |
| 3227 | cotton  |       |  |       | 1     | 0 | 0 | 1 | 0 | 1 | 1 |
| 3239 | cotton  |       |  |       | 0     | 1 | 0 | 0 | 0 | 0 | 0 |
| 3239 | cotton  |       |  |       | -5.4  | 0 | 0 | 0 | 0 | 0 | 0 |

|      |        |       |       |       |       |   |   |   |   |   |   |
|------|--------|-------|-------|-------|-------|---|---|---|---|---|---|
| 3239 | cotton | -3.4  |       |       | 0     | 0 | 0 | 0 | 0 | 0 | 0 |
| 3239 | cotton |       | -3.5  |       | 0     | 0 | 0 | 0 | 0 | 0 | 0 |
| 3239 | cotton | -21.3 |       |       | 0     | 0 | 0 | 0 | 0 | 0 | 0 |
| 3239 | cotton |       |       | 0.0   | 0     | 0 | 0 | 0 | 0 | 0 | 0 |
| 3239 | cotton |       | -10.9 |       | 0     | 0 | 0 | 0 | 0 | 0 | 0 |
| 3243 | cotton |       |       |       | 1     | 0 | 0 | 1 | 0 | 1 | 1 |
| 3243 | cotton |       |       |       | 1     | 0 | 0 | 1 | 0 | 1 | 1 |
| 3243 | cotton |       |       |       | 1     | 0 | 0 | 1 | 0 | 1 | 1 |
| 3243 | cotton |       |       |       | 1     | 0 | 0 | 1 | 0 | 1 | 1 |
| 3243 | cotton | -7.7  |       |       | 1     | 0 | 0 | 1 | 0 | 1 | 1 |
| 3243 | cotton |       |       |       | 1     | 0 | 0 | 1 | 0 | 1 | 1 |
| 3243 | cotton | -4.4  |       |       | 1     | 0 | 0 | 1 | 0 | 1 | 1 |
| 3243 | cotton |       |       |       | 1     | 0 | 0 | 1 | 0 | 1 | 1 |
| 3243 | cotton |       |       |       | 1     | 0 | 0 | 1 | 0 | 1 | 1 |
| 3243 | cotton |       | -8.2  |       | 1     | 0 | 0 | 1 | 0 | 1 | 1 |
| 3243 | cotton |       |       |       | 1     | 0 | 0 | 1 | 0 | 1 | 1 |
| 3243 | cotton |       |       |       | 1     | 0 | 0 | 1 | 0 | 1 | 1 |
| 3243 | cotton | -10.0 |       |       | 1     | 0 | 0 | 1 | 0 | 1 | 1 |
| 3243 | cotton | -5.6  |       |       | 1     | 0 | 0 | 1 | 0 | 1 | 1 |
| 3243 | cotton |       |       |       | 1     | 0 | 0 | 1 | 0 | 1 | 1 |
| 3243 | cotton |       |       |       | 1     | 0 | 0 | 1 | 0 | 1 | 1 |
| 3243 | cotton |       | -63.5 |       | 1     | 0 | 0 | 1 | 0 | 1 | 1 |
| 3243 | cotton |       | -22.7 |       | 1     | 0 | 0 | 1 | 0 | 1 | 1 |
| 3243 | cotton |       | -39.5 |       | 1     | 0 | 0 | 1 | 0 | 1 | 1 |
| 3243 | cotton |       |       |       | 1     | 0 | 0 | 1 | 0 | 1 | 1 |
| 3246 | maize  | 34.3  |       |       | 1     | 0 | 0 | 1 | 0 | 1 | 1 |
| 3246 | maize  |       | -51.9 |       | 1     | 0 | 0 | 1 | 0 | 1 | 1 |
| 3246 | maize  |       |       |       | 1     | 0 | 0 | 1 | 0 | 1 | 1 |
| 3246 | maize  |       |       |       | 1     | 0 | 0 | 1 | 0 | 1 | 1 |
| 3246 | maize  |       |       | -4.4  | 1     | 0 | 0 | 1 | 0 | 1 | 1 |
| 3246 | maize  | 25.2  |       |       | 1     | 1 | 0 | 1 | 0 | 1 | 1 |
| 3247 | cotton | 17.6  |       |       | 1     | 0 | 0 | 1 | 0 | 0 | 0 |
| 3247 | cotton |       |       |       | 1     | 0 | 0 | 1 | 0 | 0 | 0 |
| 3247 | cotton | 9.2   |       |       | 1     | 0 | 0 | 1 | 0 | 0 | 0 |
| 3247 | cotton |       |       |       | 1     | 0 | 0 | 1 | 0 | 0 | 0 |
| 3247 | cotton |       |       | -0.1  | 1     | 0 | 0 | 1 | 0 | 0 | 0 |
| 3247 | cotton |       |       | -8.5  | 1     | 0 | 0 | 1 | 0 | 0 | 0 |
| 3247 | cotton |       |       |       | 131.0 | 1 | 0 | 0 | 1 | 0 | 0 |
| 3247 | cotton |       |       | -22.2 | 1     | 0 | 0 | 1 | 0 | 0 | 0 |
| 3247 | cotton |       |       |       | -4.8  | 1 | 0 | 0 | 1 | 0 | 0 |
| 3247 | cotton | 74.6  |       |       | 1     | 0 | 0 | 1 | 0 | 0 | 0 |
| 3247 | cotton |       |       |       | 1     | 0 | 0 | 1 | 0 | 0 | 0 |
