# Supplementary material for: A Meta-Analysis of the Impacts of Genetically Modified Crops
Source: PLoS One. 2014 Nov 3;9(11):e111629. doi: 10.1371/journal.pone.0111629 (PMC4218791; doi:10.1371/journal.pone.0111629)
Supplement: Table S3 — Weighted mean impacts of GM crop adoption. (PDF) [file pone.0111629.s006.pdf]

**Table S3. Weighted mean impacts of GM crop adoption (%)**

| <b>Outcome variable</b>             | <b>All GM crops</b>                    | <b>Insect resistance</b>               | <b>Herbicide tolerance</b>            |
|-------------------------------------|----------------------------------------|----------------------------------------|---------------------------------------|
| Yield<br><i>n/m</i>                 | 18.66*** (14.01; 23.30)<br>451 / 100   | 21.98*** (20.36; 29.93)<br>353 / 83    | 6.02* (-0.71; 12.75)<br>94 / 25       |
| Pesticide quantity<br><i>n/m</i>    | -32.87*** (-43.77; -21.96)<br>121 / 37 | -38.97*** (-49.88; -28.05)<br>108 / 31 | -0.59 (-34.50; 33.31)<br>13 / 7       |
| Pesticide cost<br><i>n/m</i>        | -38.69*** (-45.90; -31.47)<br>193 / 57 | -39.45*** (-47.85; -31.06)<br>145 / 45 | -36.21*** (-52.38; -20.04)<br>48 / 15 |
| Total production cost<br><i>n/m</i> | 2.73 (-2.00; 7.45)<br>115 / 46         | 3.94* (-0.68; 10.19)<br>96 / 38        | -5.51 (-14.44; 3.40)<br>19 / 10       |
| Farmer profit<br><i>n/m</i>         | 59.37*** (27.88; 90.87)<br>136 / 42    | 60.01*** (26.70; 93.31)<br>119 / 36    | 56.48 (-58.94; 171.90)<br>17 / 9      |

Average percentage differences between GM and non-GM crops are shown with 95% confidence intervals in parentheses. Mean values were calculated using the inverse of the number of impact observations per dataset as weights. \*, \*\*, \*\*\* indicate statistical significance at the 10%, 5%, and 1% level, respectively. *n* is the number of observations, *m* the number of different primary datasets from which these observations are derived.
